# Supplementary material for: Migraine Pain Location and Measures of Healthcare Use and Distress: An Observational Study
Source: Hindawi journal article supplement (doi:10.1155/2018/6157982), 2018-06-04
Supplement: f1 [file 6157982.f1.pdf]

# Supplementary file with raw data and statistical comparisons

| lateralized_<br>Cumulative<br>headaches<br>Frequency | RminusL | SideLoc | Frequency |     |
|------------------------------------------------------|---------|---------|-----------|-----|
| -----<br>-----                                       |         |         |           |     |
| .<br>26                                              | .       |         | 26        |     |
| .<br>27                                              | -3      | Left    | 1         |     |
| .<br>29                                              | -2      | Left    | 2         |     |
| .<br>36                                              | -1      | Left    | 7         |     |
| .<br>62                                              | 0       |         | 26        |     |
| .<br>69                                              | 1       | Right   | 7         |     |
| .<br>72                                              | 2       | Right   | 3         |     |
| .<br>76                                              | 3       | Right   | 4         |     |
| No<br>300                                            | .       |         | 224       |     |
| Yes<br>346                                           | -3      | Left    | 31        | 331 |
| Yes<br>374                                           | -2      | Left    | 15        |     |
| Yes<br>430                                           | -1      | Left    | 28        |     |
| Yes<br>471                                           | 0       |         | 56        |     |
| Yes<br>490                                           | 1       | Right   | 41        |     |
| Yes<br>550                                           | 2       | Right   | 19        |     |
|                                                      | 3       | Right   | 60        |     |

Table of r\_lat\_score by l\_lat\_score

```
r_lat_score(Right laterality score)
      l_lat_score(Left laterality score)
```

| Frequency  | 1never | 2sometim<br>es | 3usually | 4always | Total |
|------------|--------|----------------|----------|---------|-------|
| 1never     | 0      | 3              | 15       | 32      | 50    |
| 2sometimes | 9      | 67             | 31       | 2       | 109   |
| 3usually   | 19     | 39             | 14       | 1       | 73    |
| 4always    | 64     | 3              | 0        | 1       | 68    |
| Total      | 92     | 112            | 60       | 36      | 300   |

~~~~~

This is Never on one and Always on the other

| Extreme<br>Side | Frequency | Percent |
|-----------------|-----------|---------|
| Left            | 32        | 33.33   |
| Right           | 64        | 66.67   |

ExtremeSide = Left

|                      |        |
|----------------------|--------|
| Proportion           | 0.3333 |
| 95% Lower Conf Limit | 0.2404 |
| 95% Upper Conf Limit | 0.4369 |

Test of H0: Proportion = 0.5 P = 0.0011

~~~~~

This is Never on one and Non-Never on the other:

| Occurs<br>Side | Frequency | Percent |
|----------------|-----------|---------|
| Left           | 50        | 35.21   |
| Right          | 92        | 64.79   |

OccursSide = Left

```

Proportion          0.3521
95% Lower Conf Limit 0.2739
95% Upper Conf Limit 0.4366

```

Test of H0: Proportion = 0.5    P =    0.0004

~~~~~  
Migraines only:  
~~~~~

Table of r\_lat\_score by l\_lat\_score

r\_lat\_score(Right laterality score)

l\_lat\_score(Left laterality score)

| Frequency  | 1never | 2sometim | 3usually | 4always | Total |
|------------|--------|----------|----------|---------|-------|
|            |        | es       |          |         |       |
| 1never     | 0      | 3        | 15       | 24      | 42    |
| 2sometimes | 9      | 66       | 29       | 2       | 106   |
| 3usually   | 19     | 38       | 13       | 1       | 71    |
| 4always    | 50     | 3        | 0        | 1       | 54    |
| Total      | 78     | 110      | 57       | 28      | 273   |

~~~~~  
This is Never on one and Always on the other

Extreme

| Side  | Frequency | Percent |
|-------|-----------|---------|
| Left  | 24        | 32.43   |
| Right | 50        | 67.57   |

ExtremeSide = Left

```

Proportion          0.3243
95% Lower Conf Limit 0.2200
95% Upper Conf Limit 0.4432

```

Test of H0: Proportion = 0.5 p = 0.0025

~~~~~

This is Never on one and Non-Never on the other:

| Occurs |           |         |
|--------|-----------|---------|
| Side   | Frequency | Percent |
| -----  |           |         |
| Left   | 42        | 35.00   |
| Right  | 78        | 65.00   |

OccursSide = Left

|                      |        |
|----------------------|--------|
| Proportion           | 0.3500 |
| 95% Lower Conf Limit | 0.2652 |
| 95% Upper Conf Limit | 0.4424 |

Test of H0: Proportion = 0.5 p = 0.0010

## Full tables

Table of sex by RminusL

| sex(Sex)                                  |       | RminusL |       |       |       |    |  |
|-------------------------------------------|-------|---------|-------|-------|-------|----|--|
| Frequency                                 |       |         |       |       |       |    |  |
| Row Pct                                   |       |         |       |       |       |    |  |
| Col Pct                                   |       | -3      | -2    | -1    | 0     | 1  |  |
| 2                                         |       | 3       | Total |       |       |    |  |
| -----+-----+-----+-----+-----+-----+----- |       |         |       |       |       |    |  |
| -----+-----+                              |       |         |       |       |       |    |  |
| Female                                    | 29    | 15      | 31    | 75    | 43    | 17 |  |
| 51                                        | 261   |         |       |       |       |    |  |
|                                           | 11.11 | 5.75    | 11.88 | 28.74 | 16.48 |    |  |
| 6.51                                      | 19.54 |         |       |       |       |    |  |
|                                           | 90.63 | 88.24   | 88.57 | 91.46 | 89.58 |    |  |
| 77.27                                     | 79.69 |         |       |       |       |    |  |
| -----+-----+-----+-----+-----+-----+----- |       |         |       |       |       |    |  |
| -----+-----+                              |       |         |       |       |       |    |  |
| Male                                      | 3     | 2       | 4     | 7     | 5     | 5  |  |
| 13                                        | 39    |         |       |       |       |    |  |

|                                           |       |      |       |       |       |       |  |
|-------------------------------------------|-------|------|-------|-------|-------|-------|--|
|                                           |       | 7.69 | 5.13  | 10.26 | 17.95 | 12.82 |  |
| 12.82                                     | 33.33 |      |       |       |       |       |  |
|                                           |       | 9.38 | 11.76 | 11.43 | 8.54  | 10.42 |  |
| 22.73                                     | 20.31 |      |       |       |       |       |  |
| -----+-----+-----+-----+-----+-----+----- |       |      |       |       |       |       |  |
| -----+-----+                              |       |      |       |       |       |       |  |
| Total                                     |       | 32   | 17    | 35    | 82    | 48    |  |
| 22                                        | 64    | 300  |       |       |       |       |  |

Frequency Missing = 250

Table of White by RminusL

| White                                     |       | RminusL |       |       |       |       |    |
|-------------------------------------------|-------|---------|-------|-------|-------|-------|----|
| Frequency                                 |       |         |       |       |       |       |    |
| Row                                       | Pct   |         |       |       |       |       |    |
| Col                                       | Pct   | -3      | -2    | -1    | 0     | 1     |    |
|                                           | 2     | 3       | Total |       |       |       |    |
| -----+-----+-----+-----+-----+-----+----- |       |         |       |       |       |       |    |
| -+-----+                                  |       |         |       |       |       |       |    |
|                                           | 0     | 1       | 3     | 1     | 4     | 2     | 1  |
| 5                                         | 17    |         |       |       |       |       |    |
|                                           |       | 5.88    | 17.65 | 5.88  | 23.53 | 11.76 |    |
| 5.88                                      | 29.41 |         |       |       |       |       |    |
|                                           |       | 3.70    | 21.43 | 3.45  | 5.56  | 4.35  |    |
| 4.76                                      | 8.33  |         |       |       |       |       |    |
| -----+-----+-----+-----+-----+-----+----- |       |         |       |       |       |       |    |
| -+-----+                                  |       |         |       |       |       |       |    |
|                                           | 1     | 26      | 11    | 28    | 68    | 44    | 20 |
| 55                                        | 252   |         |       |       |       |       |    |
|                                           |       | 10.32   | 4.37  | 11.11 | 26.98 | 17.46 |    |
| 7.94                                      | 21.83 |         |       |       |       |       |    |
|                                           |       | 96.30   | 78.57 | 96.55 | 94.44 | 95.65 |    |
| 95.24                                     | 91.67 |         |       |       |       |       |    |
| -----+-----+-----+-----+-----+-----+----- |       |         |       |       |       |       |    |
| -+-----+                                  |       |         |       |       |       |       |    |
| Total                                     |       | 27      | 14    | 29    | 72    | 46    | 21 |
|                                           | 60    | 269     |       |       |       |       |    |

Frequency Missing = 281

# Table of ethnicity by RminusL

| ethnicity(Hispanic or Latino)             |       |  | RminusL |       |       |       |       |    |
|-------------------------------------------|-------|--|---------|-------|-------|-------|-------|----|
| Frequency                                 |       |  |         |       |       |       |       |    |
| Row Pct                                   |       |  |         |       |       |       |       |    |
| Col Pct                                   |       |  | -3      | -2    | -1    | 0     | 1     |    |
| 2                                         |       |  | 3       | Total |       |       |       |    |
| -----+-----+-----+-----+-----+-----+----- |       |  |         |       |       |       |       |    |
| -+-----+                                  |       |  |         |       |       |       |       |    |
| No                                        |       |  | 25      | 13    | 23    | 66    | 40    | 21 |
|                                           | 55    |  | 243     |       |       |       |       |    |
|                                           |       |  | 10.29   | 5.35  | 9.47  | 27.16 | 16.46 |    |
| 8.64                                      | 22.63 |  |         |       |       |       |       |    |
|                                           |       |  | 96.15   | 92.86 | 79.31 | 91.67 | 88.89 |    |
| 100.00                                    | 93.22 |  |         |       |       |       |       |    |
| -----+-----+-----+-----+-----+-----+----- |       |  |         |       |       |       |       |    |
| -+-----+                                  |       |  |         |       |       |       |       |    |
| Yes                                       |       |  | 1       | 1     | 6     | 6     | 5     | 0  |
|                                           | 4     |  | 23      |       |       |       |       |    |
|                                           |       |  | 4.35    | 4.35  | 26.09 | 26.09 | 21.74 |    |
| 0.00                                      | 17.39 |  |         |       |       |       |       |    |
|                                           |       |  | 3.85    | 7.14  | 20.69 | 8.33  | 11.11 |    |
| 0.00                                      | 6.78  |  |         |       |       |       |       |    |
| -----+-----+-----+-----+-----+-----+----- |       |  |         |       |       |       |       |    |
| -+-----+                                  |       |  |         |       |       |       |       |    |
| Total                                     |       |  | 26      | 14    | 29    | 72    | 45    | 21 |
| 59                                        | 266   |  |         |       |       |       |       |    |

Frequency Missing = 284

# Table of Married by RminusL

| Married                                   |    | RminusL |       |    |    |   |    |
|-------------------------------------------|----|---------|-------|----|----|---|----|
| Frequency                                 |    |         |       |    |    |   |    |
| Row Pct                                   |    |         |       |    |    |   |    |
| Col Pct                                   |    | -3      | -2    | -1 | 0  | 1 |    |
| 2                                         |    | 3       | Total |    |    |   |    |
| -----+-----+-----+-----+-----+-----+----- |    |         |       |    |    |   |    |
| -+-----+                                  |    |         |       |    |    |   |    |
| 0                                         | 10 | 6       | 12    | 34 | 18 | 8 | 25 |
| 113                                       |    |         |       |    |    |   |    |

|                                           |       |       |       |       |       |       |    |
|-------------------------------------------|-------|-------|-------|-------|-------|-------|----|
|                                           |       | 8.85  | 5.31  | 10.62 | 30.09 | 15.93 |    |
| 7.08                                      | 22.12 |       |       |       |       |       |    |
|                                           |       | 31.25 | 37.50 | 37.50 | 41.98 | 37.50 |    |
| 38.10                                     | 39.68 |       |       |       |       |       |    |
| -----+-----+-----+-----+-----+-----+----- |       |       |       |       |       |       |    |
| -+-----+                                  |       |       |       |       |       |       |    |
|                                           | 1     | 22    | 10    | 20    | 47    | 30    | 13 |
| 38                                        | 180   |       |       |       |       |       |    |
|                                           |       | 12.22 | 5.56  | 11.11 | 26.11 | 16.67 |    |
| 7.22                                      | 21.11 |       |       |       |       |       |    |
|                                           |       | 68.75 | 62.50 | 62.50 | 58.02 | 62.50 |    |
| 61.90                                     | 60.32 |       |       |       |       |       |    |
| -----+-----+-----+-----+-----+-----+----- |       |       |       |       |       |       |    |
| -+-----+                                  |       |       |       |       |       |       |    |
| Total                                     |       | 32    | 16    | 32    | 81    | 48    | 21 |
|                                           | 63    | 293   |       |       |       |       |    |

Frequency Missing = 257

Table of CollegeGrad by RminusL

| CollegeGrad                               |       | RminusL |       |       |       |       |       |    |
|-------------------------------------------|-------|---------|-------|-------|-------|-------|-------|----|
| Frequency                                 |       |         |       |       |       |       |       |    |
| Row                                       | Pct   |         |       |       |       |       |       |    |
| Col                                       | Pct   | -3      | -2    | -1    | 0     | 1     |       |    |
|                                           | 2     | 3       | Total |       |       |       |       |    |
| -----+-----+-----+-----+-----+-----+----- |       |         |       |       |       |       |       |    |
| -+-----+                                  |       |         |       |       |       |       |       |    |
|                                           | 0     | 9       | 7     | 15    | 27    | 14    | 6     | 26 |
|                                           | 104   |         |       |       |       |       |       |    |
|                                           |       | 8.65    | 6.73  | 14.42 | 25.96 | 13.46 |       |    |
| 5.77                                      | 25.00 |         |       |       |       |       |       |    |
|                                           |       | 37.50   | 58.33 | 50.00 | 39.13 | 32.56 |       |    |
| 33.33                                     | 41.94 |         |       |       |       |       |       |    |
| -----+-----+-----+-----+-----+-----+----- |       |         |       |       |       |       |       |    |
| -+-----+                                  |       |         |       |       |       |       |       |    |
|                                           | 1     | 15      | 5     | 15    | 42    | 29    | 12    | 36 |
|                                           | 154   |         |       |       |       |       |       |    |
|                                           |       | 9.74    | 3.25  | 9.74  | 27.27 | 18.83 |       |    |
| 7.79                                      | 23.38 |         |       |       |       |       |       |    |
|                                           |       | 62.50   | 41.67 | 50.00 | 60.87 | 67.44 | 66.67 |    |
|                                           | 58.06 |         |       |       |       |       |       |    |

|       |     |    |    |    |    |    |
|-------|-----|----|----|----|----|----|
| Total | 24  | 12 | 30 | 69 | 43 | 18 |
| 62    | 258 |    |    |    |    |    |

Frequency Missing = 292

Table of Employed by RminusL

Employed RminusL

|           |       |       |       |       |       |    |    |
|-----------|-------|-------|-------|-------|-------|----|----|
| Frequency |       |       |       |       |       |    |    |
| Row Pct   |       |       |       |       |       |    |    |
| Col Pct   |       | -3    | -2    | -1    | 0     | 1  |    |
| 2         | 3     | Total |       |       |       |    |    |
| 0         | 4     | 6     | 14    | 24    | 14    | 4  | 19 |
| 85        |       |       |       |       |       |    |    |
|           | 4.71  | 7.06  | 16.47 | 28.24 | 16.47 |    |    |
| 4.71      | 22.35 |       |       |       |       |    |    |
|           | 14.29 | 54.55 | 48.28 | 34.29 | 32.56 |    |    |
| 25.00     | 33.33 |       |       |       |       |    |    |
| 1         | 24    | 5     | 15    | 46    | 29    | 12 | 38 |
| 169       |       |       |       |       |       |    |    |
|           | 14.20 | 2.96  | 8.88  | 27.22 | 17.16 |    |    |
| 7.10      | 22.49 |       |       |       |       |    |    |
|           | 85.71 | 45.45 | 51.72 | 65.71 | 67.44 |    |    |
| 75.00     | 66.67 |       |       |       |       |    |    |
| Total     | 28    | 11    | 29    | 70    | 43    | 16 |    |
| 57        | 254   |       |       |       |       |    |    |

Frequency Missing = 296

Table of aura by RminusL

aura(Is aura present?) RminusL



| Frequency                                       |       |       |       |       |       |    |  |
|-------------------------------------------------|-------|-------|-------|-------|-------|----|--|
| Row Pct                                         |       |       |       |       |       |    |  |
| Col Pct                                         |       |       |       |       |       |    |  |
| 2  3  Total                                     |       |       |       |       |       |    |  |
| -----+-----+-----+-----+-----+-----+-----+----- |       |       |       |       |       |    |  |
| -+-----+-----                                   |       |       |       |       |       |    |  |
| No                                              | 11    | 8     | 17    | 32    | 21    | 8  |  |
| 23                                              | 120   |       |       |       |       |    |  |
|                                                 | 9.17  | 6.67  | 14.17 | 26.67 | 17.50 |    |  |
| 6.67                                            | 19.17 |       |       |       |       |    |  |
|                                                 | 61.11 | 80.00 | 77.27 | 72.73 | 75.00 |    |  |
| 53.33                                           | 67.65 |       |       |       |       |    |  |
| -----+-----+-----+-----+-----+-----+-----+----- |       |       |       |       |       |    |  |
| -+-----+-----                                   |       |       |       |       |       |    |  |
| Yes                                             | 7     | 2     | 5     | 12    | 7     | 7  |  |
|                                                 | 11    | 51    |       |       |       |    |  |
|                                                 | 13.73 | 3.92  | 9.80  | 23.53 | 13.73 |    |  |
| 13.73                                           | 21.57 |       |       |       |       |    |  |
|                                                 | 38.89 | 20.00 | 22.73 | 27.27 | 25.00 |    |  |
| 46.67                                           | 32.35 |       |       |       |       |    |  |
| -----+-----+-----+-----+-----+-----+-----+----- |       |       |       |       |       |    |  |
| -+-----+-----                                   |       |       |       |       |       |    |  |
| Total                                           | 18    | 10    | 22    | 44    | 28    | 15 |  |
|                                                 | 34    | 171   |       |       |       |    |  |

Frequency Missing = 379

Table of lateralized\_headaches by RminusL

lateralized\_headaches(Are headaches lateralized?) RminusL

| Frequency                                       |      |      |      |      |      |   |  |
|-------------------------------------------------|------|------|------|------|------|---|--|
| Row Pct                                         |      |      |      |      |      |   |  |
| Col Pct                                         |      |      |      |      |      |   |  |
| 2  3  Total                                     |      |      |      |      |      |   |  |
| -----+-----+-----+-----+-----+-----+-----+----- |      |      |      |      |      |   |  |
| -+-----+-----                                   |      |      |      |      |      |   |  |
| No                                              | 0    | 0    | 0    | 0    | 0    | 0 |  |
|                                                 | 0    | 0    |      |      |      |   |  |
|                                                 | .    | .    | .    | .    | .    | . |  |
|                                                 | .    |      |      |      |      |   |  |
|                                                 | 0.00 | 0.00 | 0.00 | 0.00 | 0.00 |   |  |
| 0.00                                            | 0.00 |      |      |      |      |   |  |

|        |        |        |        |        |        |    |
|--------|--------|--------|--------|--------|--------|----|
|        |        |        |        |        |        |    |
|        |        |        |        |        |        |    |
| Yes    | 31     | 15     | 28     | 56     | 41     | 19 |
| 60     | 250    |        |        |        |        |    |
|        | 12.40  | 6.00   | 11.20  | 22.40  | 16.40  |    |
| 7.60   | 24.00  |        |        |        |        |    |
|        | 100.00 | 100.00 | 100.00 | 100.00 | 100.00 |    |
| 100.00 | 100.00 |        |        |        |        |    |
|        |        |        |        |        |        |    |
|        |        |        |        |        |        |    |
| Total  | 31     | 15     | 28     | 56     | 41     | 19 |
| 60     | 250    |        |        |        |        |    |

Frequency Missing = 300

Table of MigraineDx by RminusL

| MigraineDx                                |       | RminusL |        |       |       |       |        |
|-------------------------------------------|-------|---------|--------|-------|-------|-------|--------|
| Frequency                                 |       |         |        |       |       |       |        |
| Row                                       | Pct   |         |        |       |       |       |        |
| Col                                       | Pct   | -3      | -2     | -1    | 0     | 1     |        |
|                                           | 2     | 3       | Total  |       |       |       |        |
| -----+-----+-----+-----+-----+-----+----- |       |         |        |       |       |       |        |
| -+-----+                                  |       |         |        |       |       |       |        |
|                                           | 0     | 8       | 0      | 2     | 2     | 1     | 0      |
| 14                                        | 27    |         |        |       |       |       |        |
|                                           |       | 29.63   | 0.00   | 7.41  | 7.41  | 3.70  |        |
| 0.00                                      | 51.85 |         |        |       |       |       |        |
|                                           |       | 25.00   | 0.00   | 5.71  | 2.44  | 2.08  |        |
| 0.00                                      | 21.88 |         |        |       |       |       |        |
| -----+-----+-----+-----+-----+-----+----- |       |         |        |       |       |       |        |
| -+-----+                                  |       |         |        |       |       |       |        |
|                                           | 1     | 24      | 17     | 33    | 80    | 47    | 22     |
| 50                                        | 273   |         |        |       |       |       |        |
|                                           |       | 8.79    | 6.23   | 12.09 | 29.30 | 17.22 |        |
| 8.06                                      | 18.32 |         |        |       |       |       |        |
|                                           |       | 75.00   | 100.00 | 94.29 | 97.56 | 97.92 | 100.00 |
|                                           | 78.13 |         |        |       |       |       |        |
| -----+-----+-----+-----+-----+-----+----- |       |         |        |       |       |       |        |
| -+-----+                                  |       |         |        |       |       |       |        |
| Total                                     |       | 32      | 17     | 35    | 82    | 48    | 22     |
|                                           | 64    | 300     |        |       |       |       |        |

Frequency Missing = 250

Table of RightHanded by RminusL

| RightHanded                               |       | RminusL |       |        |       |       |    |
|-------------------------------------------|-------|---------|-------|--------|-------|-------|----|
| Frequency                                 |       |         |       |        |       |       |    |
| Row                                       | Pct   |         |       |        |       |       |    |
| Col                                       | Pct   | -3      | -2    | -1     | 0     | 1     |    |
|                                           | 2     | 3       | Total |        |       |       |    |
| -----+-----+-----+-----+-----+-----+----- |       |         |       |        |       |       |    |
| -+-----+-----                             |       |         |       |        |       |       |    |
| 0                                         | 7     | 2       | 0     | 10     | 2     | 0     |    |
| 7                                         | 28    |         |       |        |       |       |    |
|                                           |       | 25.00   | 7.14  | 0.00   | 35.71 | 7.14  |    |
| 0.00                                      | 25.00 |         |       |        |       |       |    |
|                                           |       | 25.00   | 13.33 | 0.00   | 12.99 | 4.88  |    |
| 0.00                                      | 11.86 |         |       |        |       |       |    |
| -----+-----+-----+-----+-----+-----+----- |       |         |       |        |       |       |    |
| -+-----+-----                             |       |         |       |        |       |       |    |
| 1                                         | 21    | 13      | 29    | 67     | 39    | 20    |    |
| 52                                        | 241   |         |       |        |       |       |    |
|                                           |       | 8.71    | 5.39  | 12.03  | 27.80 | 16.18 |    |
| 8.30                                      | 21.58 |         |       |        |       |       |    |
|                                           |       | 75.00   | 86.67 | 100.00 | 87.01 | 95.12 |    |
| 100.00                                    | 88.14 |         |       |        |       |       |    |
| -----+-----+-----+-----+-----+-----+----- |       |         |       |        |       |       |    |
| -+-----+-----                             |       |         |       |        |       |       |    |
| Total                                     |       | 28      | 15    | 29     | 77    | 41    | 20 |
|                                           | 59    | 269     |       |        |       |       |    |

Frequency Missing = 281

Table of Substance by RminusL

| Substance |     | RminusL |       |    |   |   |
|-----------|-----|---------|-------|----|---|---|
| Frequency |     |         |       |    |   |   |
| Row       | Pct |         |       |    |   |   |
| Col       | Pct | -3      | -2    | -1 | 0 | 1 |
|           | 2   | 3       | Total |    |   |   |

|       |        |       |       |       |        |    |
|-------|--------|-------|-------|-------|--------|----|
|       |        |       |       |       |        |    |
|       |        |       |       |       |        |    |
| 0     | 32     | 16    | 34    | 80    | 48     | 20 |
| 64    | 294    |       |       |       |        |    |
|       | 10.88  | 5.44  | 11.56 | 27.21 | 16.33  |    |
| 6.80  | 21.77  |       |       |       |        |    |
|       | 100.00 | 94.12 | 97.14 | 97.56 | 100.00 |    |
| 90.91 | 100.00 |       |       |       |        |    |
|       |        |       |       |       |        |    |
|       |        |       |       |       |        |    |
| 1     | 0      | 1     | 1     | 2     | 0      | 2  |
| 0     | 6      |       |       |       |        |    |
|       | 0.00   | 16.67 | 16.67 | 33.33 | 0.00   |    |
| 33.33 | 0.00   |       |       |       |        |    |
|       | 0.00   | 5.88  | 2.86  | 2.44  | 0.00   |    |
| 9.09  | 0.00   |       |       |       |        |    |
|       |        |       |       |       |        |    |
|       |        |       |       |       |        |    |
| Total | 32     | 17    | 35    | 82    | 48     | 22 |
| 64    | 300    |       |       |       |        |    |

Frequency Missing = 250

Table of Anxiety by RminusL

Anxiety RminusL

|           |       |       |       |       |       |    |
|-----------|-------|-------|-------|-------|-------|----|
| Frequency |       |       |       |       |       |    |
| Row Pct   |       |       |       |       |       |    |
| Col Pct   | -3    | -2    | -1    | 0     | 1     |    |
| 2         | 3     | Total |       |       |       |    |
|           |       |       |       |       |       |    |
|           |       |       |       |       |       |    |
| 0         | 22    | 11    | 22    | 58    | 33    | 15 |
| 48        | 209   |       |       |       |       |    |
|           | 10.53 | 5.26  | 10.53 | 27.75 | 15.79 |    |
| 7.18      | 22.97 |       |       |       |       |    |
|           | 68.75 | 64.71 | 62.86 | 70.73 | 68.75 |    |
| 68.18     | 75.00 |       |       |       |       |    |
|           |       |       |       |       |       |    |
|           |       |       |       |       |       |    |
| 1         | 10    | 6     | 13    | 24    | 15    | 7  |
| 91        |       |       |       |       |       |    |

|                                           |       |       |       |       |       |       |    |
|-------------------------------------------|-------|-------|-------|-------|-------|-------|----|
|                                           |       | 10.99 | 6.59  | 14.29 | 26.37 | 16.48 |    |
| 7.69                                      | 17.58 |       |       |       |       |       |    |
|                                           |       | 31.25 | 35.29 | 37.14 | 29.27 | 31.25 |    |
| 31.82                                     | 25.00 |       |       |       |       |       |    |
| -----+-----+-----+-----+-----+-----+----- |       |       |       |       |       |       |    |
| -+-----+                                  |       |       |       |       |       |       |    |
| Total                                     |       | 32    | 17    | 35    | 82    | 48    | 22 |
|                                           | 64    | 300   |       |       |       |       |    |

Frequency Missing = 250

Table of Depression by RminusL

| Depression                                |       | RminusL |       |       |       |       |    |
|-------------------------------------------|-------|---------|-------|-------|-------|-------|----|
| Frequency                                 |       |         |       |       |       |       |    |
| Row                                       | Pct   |         |       |       |       |       |    |
| Col                                       | Pct   | -3      | -2    | -1    | 0     | 1     |    |
|                                           | 2     | 3       | Total |       |       |       |    |
| -----+-----+-----+-----+-----+-----+----- |       |         |       |       |       |       |    |
| -+-----+                                  |       |         |       |       |       |       |    |
|                                           | 0     | 26      | 10    | 21    | 53    | 33    | 11 |
|                                           | 51    | 205     |       |       |       |       |    |
|                                           |       | 12.68   | 4.88  | 10.24 | 25.85 | 16.10 |    |
| 5.37                                      | 24.88 |         |       |       |       |       |    |
|                                           |       | 81.25   | 58.82 | 60.00 | 64.63 | 68.75 |    |
| 50.00                                     | 79.69 |         |       |       |       |       |    |
| -----+-----+-----+-----+-----+-----+----- |       |         |       |       |       |       |    |
| -+-----+                                  |       |         |       |       |       |       |    |
|                                           | 1     | 6       | 7     | 14    | 29    | 15    | 11 |
|                                           | 95    |         |       |       |       |       | 13 |
|                                           |       | 6.32    | 7.37  | 14.74 | 30.53 | 15.79 |    |
| 11.58                                     | 13.68 |         |       |       |       |       |    |
|                                           |       | 18.75   | 41.18 | 40.00 | 35.37 | 31.25 |    |
| 50.00                                     | 20.31 |         |       |       |       |       |    |
| -----+-----+-----+-----+-----+-----+----- |       |         |       |       |       |       |    |
| -+-----+                                  |       |         |       |       |       |       |    |
| Total                                     |       | 32      | 17    | 35    | 82    | 48    | 22 |
|                                           | 64    | 300     |       |       |       |       |    |

Frequency Missing = 250

Table of Bipolar by RminusL

Bipolar      RminusL

| Frequency                                 |       |       |       |       |       |      |   |
|-------------------------------------------|-------|-------|-------|-------|-------|------|---|
| Row Pct                                   |       |       |       |       |       |      |   |
| Col Pct                                   | -3    | -2    | -1    | 0     | 1     |      |   |
| 2                                         | 3     | Total |       |       |       |      |   |
| -----+-----+-----+-----+-----+-----+----- |       |       |       |       |       |      |   |
| -+-----+                                  |       |       |       |       |       |      |   |
| 0                                         | 31    | 15    | 34    | 78    | 47    | 20   |   |
| 62   287                                  |       |       |       |       |       |      |   |
|                                           | 10.80 | 5.23  | 11.85 | 27.18 | 16.38 | 6.97 |   |
| 21.60                                     |       |       |       |       |       |      |   |
|                                           | 96.88 | 88.24 | 97.14 | 95.12 | 97.92 |      |   |
| 90.91                                     | 96.88 |       |       |       |       |      |   |
| -----+-----+-----+-----+-----+-----+----- |       |       |       |       |       |      |   |
| -+-----+                                  |       |       |       |       |       |      |   |
| 1                                         | 1     | 2     | 1     | 4     | 1     | 2    | 2 |
|                                           | 13    |       |       |       |       |      |   |
|                                           | 7.69  | 15.38 | 7.69  | 30.77 | 7.69  |      |   |
| 15.38                                     | 15.38 |       |       |       |       |      |   |
|                                           | 3.13  | 11.76 | 2.86  | 4.88  | 2.08  |      |   |
| 9.09                                      | 3.13  |       |       |       |       |      |   |
| -----+-----+-----+-----+-----+-----+----- |       |       |       |       |       |      |   |
| -+-----+                                  |       |       |       |       |       |      |   |
| Total                                     | 32    | 17    | 35    | 82    | 48    | 22   |   |
| 64                                        | 300   |       |       |       |       |      |   |

Frequency Missing = 250

Table of Cognitive by RminusL

Cognitive      RminusL

| Frequency                                 |    |       |    |    |    |    |  |
|-------------------------------------------|----|-------|----|----|----|----|--|
| Row Pct                                   |    |       |    |    |    |    |  |
| Col Pct                                   | -3 | -2    | -1 | 0  | 1  |    |  |
| 2                                         | 3  | Total |    |    |    |    |  |
| -----+-----+-----+-----+-----+-----+----- |    |       |    |    |    |    |  |
| -+-----+                                  |    |       |    |    |    |    |  |
| 0                                         | 32 | 17    | 35 | 82 | 48 | 22 |  |
| 64   300                                  |    |       |    |    |    |    |  |

|                                           |        |        |        |        |        |        |    |
|-------------------------------------------|--------|--------|--------|--------|--------|--------|----|
|                                           |        | 10.67  | 5.67   | 11.67  | 27.33  | 16.00  |    |
| 7.33                                      | 21.33  |        |        |        |        |        |    |
|                                           |        | 100.00 | 100.00 | 100.00 | 100.00 | 100.00 |    |
| 100.00                                    | 100.00 |        |        |        |        |        |    |
| -----+-----+-----+-----+-----+-----+----- |        |        |        |        |        |        |    |
| -+-----+                                  |        |        |        |        |        |        |    |
|                                           | 1      | 0      | 0      | 0      | 0      | 0      | 0  |
| 0                                         | 0      |        |        |        |        |        |    |
|                                           |        | .      | .      | .      | .      | .      | .  |
|                                           | .      |        |        |        |        |        |    |
|                                           |        | 0.00   | 0.00   | 0.00   | 0.00   | 0.00   |    |
| 0.00                                      | 0.00   |        |        |        |        |        |    |
| -----+-----+-----+-----+-----+-----+----- |        |        |        |        |        |        |    |
| -+-----+                                  |        |        |        |        |        |        |    |
| Total                                     |        | 32     | 17     | 35     | 82     | 48     | 22 |
|                                           | 64     | 300    |        |        |        |        |    |

Frequency Missing = 250

Table of Eating by RminusL

Eating RminusL

|                                           |        |        |        |        |        |        |    |
|-------------------------------------------|--------|--------|--------|--------|--------|--------|----|
| Frequency                                 |        |        |        |        |        |        |    |
| Row Pct                                   |        |        |        |        |        |        |    |
| Col Pct                                   |        | -3     | -2     | -1     | 0      | 1      |    |
|                                           | 2      | 3      | Total  |        |        |        |    |
| -----+-----+-----+-----+-----+-----+----- |        |        |        |        |        |        |    |
| -+-----+                                  |        |        |        |        |        |        |    |
|                                           | 0      | 32     | 17     | 35     | 78     | 48     | 22 |
| 64                                        | 296    |        |        |        |        |        |    |
|                                           |        | 10.81  | 5.74   | 11.82  | 26.35  | 16.22  |    |
| 7.43                                      | 21.62  |        |        |        |        |        |    |
|                                           |        | 100.00 | 100.00 | 100.00 | 95.12  | 100.00 |    |
| 100.00                                    | 100.00 |        |        |        |        |        |    |
| -----+-----+-----+-----+-----+-----+----- |        |        |        |        |        |        |    |
| -+-----+                                  |        |        |        |        |        |        |    |
|                                           | 1      | 0      | 0      | 0      | 4      | 0      | 0  |
| 0                                         | 4      |        |        |        |        |        |    |
|                                           |        | 0.00   | 0.00   | 0.00   | 100.00 | 0.00   |    |
| 0.00                                      | 0.00   |        |        |        |        |        |    |
|                                           |        | 0.00   | 0.00   | 0.00   | 4.88   | 0.00   |    |
| 0.00                                      | 0.00   |        |        |        |        |        |    |

|       |     |    |    |    |    |    |
|-------|-----|----|----|----|----|----|
|       |     |    |    |    |    |    |
|       |     |    |    |    |    |    |
| Total | 32  | 17 | 35 | 82 | 48 | 22 |
| 64    | 300 |    |    |    |    |    |

Frequency Missing = 250

Table of Psychotic by RminusL

| Psychotic                                 |       | RminusL |        |        |        |        |  |
|-------------------------------------------|-------|---------|--------|--------|--------|--------|--|
| Frequency                                 |       |         |        |        |        |        |  |
| Row Pct                                   |       |         |        |        |        |        |  |
| Col Pct                                   |       | -3      | -2     | -1     | 0      | 1      |  |
| 2                                         | 3     | Total   |        |        |        |        |  |
| -----+-----+-----+-----+-----+-----+----- |       |         |        |        |        |        |  |
| -+-----+-----                             |       |         |        |        |        |        |  |
| 0                                         | 32    | 17      | 35     | 82     | 48     | 21     |  |
| 63                                        | 298   |         |        |        |        |        |  |
|                                           |       | 10.74   | 5.70   | 11.74  | 27.52  | 16.11  |  |
| 7.05                                      | 21.14 |         |        |        |        |        |  |
|                                           |       | 100.00  | 100.00 | 100.00 | 100.00 | 100.00 |  |
| 95.45                                     | 98.44 |         |        |        |        |        |  |
| -----+-----+-----+-----+-----+-----+----- |       |         |        |        |        |        |  |
| -+-----+-----                             |       |         |        |        |        |        |  |
| 1                                         | 0     | 0       | 0      | 0      | 0      | 1      |  |
| 1                                         | 2     |         |        |        |        |        |  |
|                                           |       | 0.00    | 0.00   | 0.00   | 0.00   | 0.00   |  |
| 50.00                                     | 50.00 |         |        |        |        |        |  |
|                                           |       | 0.00    | 0.00   | 0.00   | 0.00   | 0.00   |  |
| 4.55                                      | 1.56  |         |        |        |        |        |  |
| -----+-----+-----+-----+-----+-----+----- |       |         |        |        |        |        |  |
| -+-----+-----                             |       |         |        |        |        |        |  |
| Total                                     | 32    | 17      | 35     | 82     | 48     | 22     |  |
| 64                                        | 300   |         |        |        |        |        |  |

Frequency Missing = 250

Table of PTSD by RminusL

PTSD RminusL



| Frequency                                 |       |       |       |       |       |       |        |
|-------------------------------------------|-------|-------|-------|-------|-------|-------|--------|
| Row                                       | Pct   |       |       |       |       |       |        |
| Col                                       | Pct   | -3    | -2    | -1    | 0     | 1     |        |
|                                           | 2     | 3     | Total |       |       |       |        |
| -----+-----+-----+-----+-----+-----+----- |       |       |       |       |       |       |        |
| -+-----+-----                             |       |       |       |       |       |       |        |
|                                           | 0     | 28    | 15    | 33    | 76    | 47    | 22     |
| 63                                        | 284   |       |       |       |       |       |        |
|                                           |       | 9.86  | 5.28  | 11.62 | 26.76 | 16.55 |        |
| 7.75                                      | 22.18 |       |       |       |       |       |        |
|                                           |       | 87.50 | 88.24 | 94.29 | 92.68 | 97.92 | 100.00 |
| 98.44                                     |       |       |       |       |       |       |        |
| -----+-----+-----+-----+-----+-----+----- |       |       |       |       |       |       |        |
| -+-----+-----                             |       |       |       |       |       |       |        |
|                                           | 1     | 4     | 2     | 2     | 6     | 1     | 0      |
| 1                                         | 16    |       |       |       |       |       |        |
|                                           |       | 25.00 | 12.50 | 12.50 | 37.50 | 6.25  |        |
| 0.00                                      | 6.25  |       |       |       |       |       |        |
|                                           |       | 12.50 | 11.76 | 5.71  | 7.32  | 2.08  |        |
| 0.00                                      | 1.56  |       |       |       |       |       |        |
| -----+-----+-----+-----+-----+-----+----- |       |       |       |       |       |       |        |
| -+-----+-----                             |       |       |       |       |       |       |        |
| Total                                     |       | 32    | 17    | 35    | 82    | 48    | 22     |
| 64                                        | 300   |       |       |       |       |       |        |

Frequency Missing = 250

Table of OpiodsPrior by RminusL

| OpiodsPrior                               |       | RminusL |       |       |       |       |    |
|-------------------------------------------|-------|---------|-------|-------|-------|-------|----|
| Frequency                                 |       |         |       |       |       |       |    |
| Row                                       | Pct   |         |       |       |       |       |    |
| Col                                       | Pct   | -3      | -2    | -1    | 0     | 1     |    |
|                                           | 2     | 3       | Total |       |       |       |    |
| -----+-----+-----+-----+-----+-----+----- |       |         |       |       |       |       |    |
| -+-----+                                  |       |         |       |       |       |       |    |
|                                           | 0     | 24      | 13    | 25    | 71    | 40    | 18 |
| 50                                        | 241   |         |       |       |       |       |    |
|                                           |       | 9.96    | 5.39  | 10.37 | 29.46 | 16.60 |    |
| 7.47                                      | 20.75 |         |       |       |       |       |    |
|                                           |       | 75.00   | 76.47 | 71.43 | 86.59 | 83.33 |    |
| 81.82                                     | 78.13 |         |       |       |       |       |    |

|       |       |       |       |       |       |    |
|-------|-------|-------|-------|-------|-------|----|
|       |       |       |       |       |       |    |
|       |       |       |       |       |       |    |
| 1     | 8     | 4     | 10    | 11    | 8     | 4  |
| 14    | 59    |       |       |       |       |    |
|       | 13.56 | 6.78  | 16.95 | 18.64 | 13.56 |    |
| 6.78  | 23.73 |       |       |       |       |    |
|       | 25.00 | 23.53 | 28.57 | 13.41 | 16.67 |    |
| 18.18 | 21.88 |       |       |       |       |    |
|       |       |       |       |       |       |    |
|       |       |       |       |       |       |    |
| Total | 32    | 17    | 35    | 82    | 48    | 22 |
| 64    | 300   |       |       |       |       |    |

Frequency Missing = 250

Table of BarbituratesPrior by RminusL

BarbituratesPrior RminusL

|                                                                           |     |       |  |       |  |       |  |       |  |       |  |
|---------------------------------------------------------------------------|-----|-------|--|-------|--|-------|--|-------|--|-------|--|
| Frequency                                                                 |     |       |  |       |  |       |  |       |  |       |  |
| Row                                                                       | Pct |       |  |       |  |       |  |       |  |       |  |
| Col                                                                       | Pct | -3    |  | -2    |  | -1    |  | 0     |  | 1     |  |
| 2                                                                         |     | 3     |  | Total |  |       |  |       |  |       |  |
| -----+-----+-----+-----+-----+-----+-----+-----+-----+-----+-----+-----   |     |       |  |       |  |       |  |       |  |       |  |
| -+-----+-----+-----+-----+-----+-----+-----+-----+-----+-----+-----+----- |     |       |  |       |  |       |  |       |  |       |  |
| 0                                                                         |     | 20    |  | 15    |  | 25    |  | 66    |  | 34    |  |
| 52                                                                        |     | 227   |  |       |  |       |  |       |  | 15    |  |
|                                                                           |     | 8.81  |  | 6.61  |  | 11.01 |  | 29.07 |  | 14.98 |  |
| 6.61                                                                      |     | 22.91 |  |       |  |       |  |       |  |       |  |
|                                                                           |     | 62.50 |  | 88.24 |  | 71.43 |  | 80.49 |  | 70.83 |  |
| 68.18                                                                     |     | 81.25 |  |       |  |       |  |       |  |       |  |
| -----+-----+-----+-----+-----+-----+-----+-----+-----+-----+-----+-----   |     |       |  |       |  |       |  |       |  |       |  |
| -+-----+-----+-----+-----+-----+-----+-----+-----+-----+-----+-----+----- |     |       |  |       |  |       |  |       |  |       |  |
| 1                                                                         |     | 12    |  | 2     |  | 10    |  | 16    |  | 14    |  |
| 73                                                                        |     |       |  |       |  |       |  |       |  | 7     |  |
|                                                                           |     | 16.44 |  | 2.74  |  | 13.70 |  | 21.92 |  | 19.18 |  |
| 9.59                                                                      |     | 16.44 |  |       |  |       |  |       |  |       |  |
|                                                                           |     | 37.50 |  | 11.76 |  | 28.57 |  | 19.51 |  | 29.17 |  |
| 31.82                                                                     |     | 18.75 |  |       |  |       |  |       |  |       |  |
| -----+-----+-----+-----+-----+-----+-----+-----+-----+-----+-----+-----   |     |       |  |       |  |       |  |       |  |       |  |
| -+-----+-----+-----+-----+-----+-----+-----+-----+-----+-----+-----+----- |     |       |  |       |  |       |  |       |  |       |  |
| Total                                                                     |     | 32    |  | 17    |  | 35    |  | 82    |  | 48    |  |
| 64                                                                        |     | 300   |  |       |  |       |  |       |  | 22    |  |

Frequency Missing = 250

Table of TriptansPrior by RminusL

TriptansPrior RminusL

| Frequency                                 |       |       |       |       |       |    |    |
|-------------------------------------------|-------|-------|-------|-------|-------|----|----|
| Row Pct                                   |       |       |       |       |       |    |    |
| Col Pct                                   | -3    | -2    | -1    | 0     | 1     | 2  |    |
| 3  Total                                  |       |       |       |       |       |    |    |
| -----+-----+-----+-----+-----+-----+----- |       |       |       |       |       |    |    |
| -+-----+-----                             |       |       |       |       |       |    |    |
| 0                                         | 12    | 11    | 20    | 52    | 23    | 11 |    |
| 30   159                                  |       |       |       |       |       |    |    |
|                                           | 7.55  | 6.92  | 12.58 | 32.70 | 14.47 |    |    |
| 6.92   18.87                              |       |       |       |       |       |    |    |
|                                           | 37.50 | 64.71 | 57.14 | 63.41 | 47.92 |    |    |
| 50.00   46.88                             |       |       |       |       |       |    |    |
| -----+-----+-----+-----+-----+-----+----- |       |       |       |       |       |    |    |
| -+-----+-----                             |       |       |       |       |       |    |    |
| 1                                         | 20    | 6     | 15    | 30    | 25    | 11 | 34 |
| 141                                       |       |       |       |       |       |    |    |
|                                           | 14.18 | 4.26  | 10.64 | 21.28 | 17.73 |    |    |
| 7.80   24.11                              |       |       |       |       |       |    |    |
|                                           | 62.50 | 35.29 | 42.86 | 36.59 | 52.08 |    |    |
| 50.00   53.13                             |       |       |       |       |       |    |    |
| -----+-----+-----+-----+-----+-----+----- |       |       |       |       |       |    |    |
| -+-----+-----                             |       |       |       |       |       |    |    |
| Total                                     | 32    | 17    | 35    | 82    | 48    | 22 |    |
| 64 300                                    |       |       |       |       |       |    |    |

Frequency Missing = 250

Table of OpioidsPost by RminusL

OpioidsPost RminusL

| Frequency   |    |    |    |   |   |
|-------------|----|----|----|---|---|
| Row Pct     |    |    |    |   |   |
| Col Pct     | -3 | -2 | -1 | 0 | 1 |
| 2  3  Total |    |    |    |   |   |



|                                           |       |       |       |       |       |       |    |
|-------------------------------------------|-------|-------|-------|-------|-------|-------|----|
|                                           |       | 8.70  | 2.90  | 13.04 | 23.19 | 20.29 |    |
| 11.59                                     | 20.29 |       |       |       |       |       |    |
|                                           |       | 18.75 | 11.76 | 25.71 | 19.51 | 29.17 |    |
| 36.36                                     | 21.88 |       |       |       |       |       |    |
| -----+-----+-----+-----+-----+-----+----- |       |       |       |       |       |       |    |
| -+-----+                                  |       |       |       |       |       |       |    |
| Total                                     |       | 32    | 17    | 35    | 82    | 48    | 22 |
|                                           | 64    | 300   |       |       |       |       |    |

Frequency Missing = 250

Table of TriptansPost by RminusL

TriptansPost RminusL

| Frequency                                 |       |       |       |       |       |       |    |    |  |   |  |
|-------------------------------------------|-------|-------|-------|-------|-------|-------|----|----|--|---|--|
| Row                                       | Pct   |       |       |       |       |       |    |    |  |   |  |
| Col                                       | Pct   | -3    |       | -2    |       | -1    |    | 0  |  | 1 |  |
|                                           | 2     | 3     |       | Total |       |       |    |    |  |   |  |
| -----+-----+-----+-----+-----+-----+----- |       |       |       |       |       |       |    |    |  |   |  |
| -+-----+                                  |       |       |       |       |       |       |    |    |  |   |  |
|                                           | 0     | 8     | 5     | 13    | 25    | 14    | 9  | 14 |  |   |  |
|                                           | 88    |       |       |       |       |       |    |    |  |   |  |
|                                           |       | 9.09  | 5.68  | 14.77 | 28.41 | 15.91 |    |    |  |   |  |
| 10.23                                     | 15.91 |       |       |       |       |       |    |    |  |   |  |
|                                           |       | 25.00 | 29.41 | 37.14 | 30.49 | 29.17 |    |    |  |   |  |
| 40.91                                     | 21.88 |       |       |       |       |       |    |    |  |   |  |
| -----+-----+-----+-----+-----+-----+----- |       |       |       |       |       |       |    |    |  |   |  |
| -+-----+                                  |       |       |       |       |       |       |    |    |  |   |  |
|                                           | 1     | 24    | 12    | 22    | 57    | 34    | 13 |    |  |   |  |
| 50                                        | 212   |       |       |       |       |       |    |    |  |   |  |
|                                           |       | 11.32 | 5.66  | 10.38 | 26.89 | 16.04 |    |    |  |   |  |
| 6.13                                      | 23.58 |       |       |       |       |       |    |    |  |   |  |
|                                           |       | 75.00 | 70.59 | 62.86 | 69.51 | 70.83 |    |    |  |   |  |
| 59.09                                     | 78.13 |       |       |       |       |       |    |    |  |   |  |
| -----+-----+-----+-----+-----+-----+----- |       |       |       |       |       |       |    |    |  |   |  |
| -+-----+                                  |       |       |       |       |       |       |    |    |  |   |  |
| Total                                     |       | 32    | 17    | 35    | 82    | 48    | 22 |    |  |   |  |
|                                           | 64    | 300   |       |       |       |       |    |    |  |   |  |

Frequency Missing = 250

Table of race by RminusL

| race(Race)                          | RminusL |        |       |       |       |    |
|-------------------------------------|---------|--------|-------|-------|-------|----|
| Frequency                           |         |        |       |       |       |    |
| Row Pct                             |         |        |       |       |       |    |
| Col Pct                             | -3      | -2     | -1    | 0     | 1     |    |
| 2                                   | 3       | Total  |       |       |       |    |
| -----+-----+-----+-----+-----+----- |         |        |       |       |       |    |
| +-----+-----+                       |         |        |       |       |       |    |
| American Indian                     | 0       | 1      | 0     | 0     | 0     |    |
| 0                                   | 0       | 1      |       |       |       |    |
| or Alaska Native                    | 0.00    | 100.00 | 0.00  | 0.00  | 0.00  |    |
| 0.00                                | 0.00    |        |       |       |       |    |
|                                     | 0.00    | 7.14   | 0.00  | 0.00  | 0.00  |    |
| 0.00                                | 0.00    |        |       |       |       |    |
| -----+-----+-----+-----+-----+----- |         |        |       |       |       |    |
| +-----+-----+                       |         |        |       |       |       |    |
| Asian                               | 0       | 0      | 1     | 2     | 0     | 0  |
| 1                                   | 4       |        |       |       |       |    |
|                                     | 0.00    | 0.00   | 25.00 | 50.00 | 0.00  |    |
| 0.00                                | 25.00   |        |       |       |       |    |
|                                     | 0.00    | 0.00   | 3.45  | 2.78  | 0.00  |    |
| 0.00                                | 1.67    |        |       |       |       |    |
| -----+-----+-----+-----+-----+----- |         |        |       |       |       |    |
| +-----+-----+                       |         |        |       |       |       |    |
| Black or African                    | 1       | 2      | 0     | 2     | 2     |    |
| 1                                   | 4       | 12     |       |       |       |    |
| /American                           | 8.33    | 16.67  | 0.00  | 16.67 | 16.67 |    |
| 8.33                                | 33.33   |        |       |       |       |    |
|                                     | 3.70    | 14.29  | 0.00  | 2.78  | 4.35  |    |
| 4.76                                | 6.67    |        |       |       |       |    |
| -----+-----+-----+-----+-----+----- |         |        |       |       |       |    |
| +-----+-----+                       |         |        |       |       |       |    |
| White                               | 26      | 11     | 28    | 68    | 44    | 20 |
| 55                                  | 252     |        |       |       |       |    |
|                                     | 10.32   | 4.37   | 11.11 | 26.98 | 17.46 |    |
| 7.94                                | 21.83   |        |       |       |       |    |
|                                     | 96.30   | 78.57  | 96.55 | 94.44 | 95.65 |    |
| 95.24                               | 91.67   |        |       |       |       |    |
| -----+-----+-----+-----+-----+----- |         |        |       |       |       |    |
| +-----+-----+                       |         |        |       |       |       |    |
| Other                               | 0       | 0      | 0     | 0     | 0     | 0  |
| 0                                   | 0       |        |       |       |       |    |

|  |  |  |  |  |  |  |  |  |  |  |  |  |  |  |  |  |  |  |  |  |  |  |  |  |  |  |  |  |  |  |  |  |  |  |  |  |  |  |  |  |  |  |  |  |  |  |  |  |  |  |  |  |  |  |  |  |  |  |  |  |  |  |  |  |  |  |  |  |  |  |  |  |  |  |  |  |  |  |  |  |  |  |  |  |  |  |  |  |  |  |  |  |  |  |  |  |  |  |  |  |  |  |  |  |  |  |  |  |  |  |  |  |  |  |  |  |  |  |  |  |  |  |  |  |  |  |  |  |  |  |  |  |  |  |  |  |  |  |  |  |  |  |  |  |  |  |  |  |  |  |  |  |  |  |  |  |  |  |  |  |  |  |  |  |  |  |  |  |  |  |  |  |  |  |  |  |  |  |  |  |  |  |  |  |  |  |  |  |  |  |  |  |  |  |  |  |  |  |  |  |  |  |  |  |  |  |  |  |  |  |  |  |  |  |  |  |  |  |  |  |  |  |  |  |  |  |  |  |  |  |  |  |  |  |  |  |  |  |  |  |  |  |  |  |  |  |  |  |  |  |  |  |  |  |  |  |  |  |  |  |  |  |  |  |  |  |  |  |  |  |  |  |  |  |  |  |  |  |  |  |  |  |  |  |  |  |  |  |  |  |  |  |  |  |  |  |  |  |  |  |  |  |  |  |  |  |  |  |  |  |  |  |  |  |  |  |  |  |  |  |  |  |  |  |  |  |  |  |  |  |  |  |  |  |  |  |  |  |  |  |  |  |  |  |  |  |  |  |  |  |  |  |  |  |  |  |  |  |  |  |  |  |  |  |  |  |  |  |  |  |  |  |  |  |  |  |  |  |  |  |  |  |  |  |  |  |  |  |  |  |  |  |  |  |  |  |  |  |  |  |  |  |  |  |  |  |  |  |  |  |  |  |  |  |  |  |  |  |  |  |  |  |  |  |  |  |  |  |  |  |  |  |  |  |  |  |  |  |  |  |  |  |  |  |  |  |  |  |  |  |  |  |  |  |  |  |  |  |  |  |  |  |  |  |  |  |  |  |  |  |  |  |  |  |  |  |  |  |  |  |  |  |  |  |  |  |  |  |  |  |  |  |  |  |  |  |  |  |  |  |  |  |  |  |  |  |  |  |  |  |  |  |  |  |  |  |  |  |  |  |  |  |  |  |  |  |  |  |  |  |  |  |  |  |  |  |  |  |  |  |  |  |  |  |  |  |  |  |  |  |  |  |  |  |  |  |  |  |  |  |  |  |  |  |  |  |  |  |  |  |  |  |  |  |  |  |  |  |  |  |  |  |  |  |  |  |  |  |  |  |  |  |  |  |  |  |  |  |  |  |  |  |  |  |  |  |  |  |  |  |  |  |  |  |  |  |  |  |  |  |  |  |  |  |  |  |  |  |  |  |  |  |  |  |  |  |  |  |  |  |  |  |  |  |  |  |  |  |  |  |  |  |  |  |  |  |  |  |  |  |  |  |  |  |  |  |  |  |  |  |  |  |  |  |  |  |  |  |  |  |  |  |  |  |  |  |  |  |  |  |  |  |  |  |  |  |  |  |  |  |  |  |  |  |  |  |  |  |  |  |  |  |  |  |  |  |  |  |  |  |  |  |  |  |  |  |  |  |  |  |  |  |  |  |  |  |  |  |  |  |  |  |  |  |  |  |  |  |  |  |  |  |  |  |  |  |  |  |  |  |  |  |  |  |  |  |  |  |  |  |  |  |  |  |  |  |  |  |  |  |  |  |  |  |  |  |  |  |  |  |  |  |  |  |  |  |  |  |  |  |  |  |  |  |  |  |  |  |  |  |  |  |  |  |  |  |  |  |  |  |  |  |  |  |  |  |  |  |  |  |  |  |  |  |  |  |  |  |  |  |  |  |  |  |  |  |  |  |  |  |  |  |  |  |  |  |  |  |  |  |  |  |  |  |  |  |  |  |  |  |  |  |  |  |  |  |  |  |  |  |  |  |  |  |  |  |  |  |  |  |  |  |  |  |  |  |  |  |  |  |  |  |  |  |  |  |  |  |  |  |  |  |  |  |  |  |  |  |  |  |  |  |  |  |  |  |  |  |  |  |  |  |  |  |  |  |  |  |  |  |  |  |  |  |  |  |  |  |  |  |  |  |  |  |  |  |  |  |  |  |  |  |  |  |  |  |  |  |  |  |  |  |  |  |  |  |  |  |  |  |  |  |  |  |  |  |  |  |  |  |  |  |  |  |  |  |  |  |  |  |  |  |  |  |  |  |  |  |  |  |  |  |  |  |  |  |  |  |  |  |  |  |  |  |  |  |  |  |  |  |  |  |  |  |  |  |  |  |  |  |  |  |  |  |  |  |  |  |  |  |  |  |  |  |  |  |  |  |  |  |  |  |  |  |  |  |  |  |  |  |  |  |  |  |  |  |  |  |  |  |  |  |  |  |  |  |  |  |  |  |  |  |  |  |  |  |  |  |  |  |  |  |  |  |  |  |  |  |  |  |  |  |  |  |  |  |  |  |  |  |  |  |  |  |  |  |  |  |  |  |  |  |  |  |  |  |  |  |  |  |  |  |  |  |  |  |  |  |  |  |  |  |  |  |  |  |  |  |  |  |  |  |  |  |  |  |  |  |  |  |  |  |  |  |  |  |  |  |  |  |  |  |  |  |  |  |  |  |  |  |  |  |  |  |  |  |  |  |  |  |  |  |  |  |  |  |  |  |  |  |  |  |  |  |  |  |  |  |  |  |  |  |  |  |  |  |  |  |  |  |  |  |  |  |  |  |  |  |  |  |  |  |  |  |  |  |  |  |  |  |  |  |  |  |  |  |  |  |  |  |  |  |  |  |  |  |  |  |  |  |  |  |  |  |  |  |  |  |  |  |  |  |  |  |  |  |  |  |  |  |  |  |  |  |  |  |  |  |  |  |  |  |  |  |  |  |  |  |  |  |  |  |  |  |  |  |  |  |  |  |  |  |  |  |  |  |  |  |  |  |  |  |  |  |  |  |  |  |  |  |  |  |  |  |  |  |  |  |  |  |  |  |  |  |  |  |  |  |  |  |  |  |  |  |  |  |  |  |  |  |  |  |  |  |  |  |  |  |  |  |  |  |  |  |  |  |  |  |  |  |  |  |  |  |  |  |  |  |  |  |  |  |  |  |  |  |  |  |  |  |  |  |  |  |  |  |  |  |  |  |  |  |  |  |  |    |
|--|--|--|--|--|--|--|--|--|--|--|--|--|--|--|--|--|--|--|--|--|--|--|--|--|--|--|--|--|--|--|--|--|--|--|--|--|--|--|--|--|--|--|--|--|--|--|--|--|--|--|--|--|--|--|--|--|--|--|--|--|--|--|--|--|--|--|--|--|--|--|--|--|--|--|--|--|--|--|--|--|--|--|--|--|--|--|--|--|--|--|--|--|--|--|--|--|--|--|--|--|--|--|--|--|--|--|--|--|--|--|--|--|--|--|--|--|--|--|--|--|--|--|--|--|--|--|--|--|--|--|--|--|--|--|--|--|--|--|--|--|--|--|--|--|--|--|--|--|--|--|--|--|--|--|--|--|--|--|--|--|--|--|--|--|--|--|--|--|--|--|--|--|--|--|--|--|--|--|--|--|--|--|--|--|--|--|--|--|--|--|--|--|--|--|--|--|--|--|--|--|--|--|--|--|--|--|--|--|--|--|--|--|--|--|--|--|--|--|--|--|--|--|--|--|--|--|--|--|--|--|--|--|--|--|--|--|--|--|--|--|--|--|--|--|--|--|--|--|--|--|--|--|--|--|--|--|--|--|--|--|--|--|--|--|--|--|--|--|--|--|--|--|--|--|--|--|--|--|--|--|--|--|--|--|--|--|--|--|--|--|--|--|--|--|--|--|--|--|--|--|--|--|--|--|--|--|--|--|--|--|--|--|--|--|--|--|--|--|--|--|--|--|--|--|--|--|--|--|--|--|--|--|--|--|--|--|--|--|--|--|--|--|--|--|--|--|--|--|--|--|--|--|--|--|--|--|--|--|--|--|--|--|--|--|--|--|--|--|--|--|--|--|--|--|--|--|--|--|--|--|--|--|--|--|--|--|--|--|--|--|--|--|--|--|--|--|--|--|--|--|--|--|--|--|--|--|--|--|--|--|--|--|--|--|--|--|--|--|--|--|--|--|--|--|--|--|--|--|--|--|--|--|--|--|--|--|--|--|--|--|--|--|--|--|--|--|--|--|--|--|--|--|--|--|--|--|--|--|--|--|--|--|--|--|--|--|--|--|--|--|--|--|--|--|--|--|--|--|--|--|--|--|--|--|--|--|--|--|--|--|--|--|--|--|--|--|--|--|--|--|--|--|--|--|--|--|--|--|--|--|--|--|--|--|--|--|--|--|--|--|--|--|--|--|--|--|--|--|--|--|--|--|--|--|--|--|--|--|--|--|--|--|--|--|--|--|--|--|--|--|--|--|--|--|--|--|--|--|--|--|--|--|--|--|--|--|--|--|--|--|--|--|--|--|--|--|--|--|--|--|--|--|--|--|--|--|--|--|--|--|--|--|--|--|--|--|--|--|--|--|--|--|--|--|--|--|--|--|--|--|--|--|--|--|--|--|--|--|--|--|--|--|--|--|--|--|--|--|--|--|--|--|--|--|--|--|--|--|--|--|--|--|--|--|--|--|--|--|--|--|--|--|--|--|--|--|--|--|--|--|--|--|--|--|--|--|--|--|--|--|--|--|--|--|--|--|--|--|--|--|--|--|--|--|--|--|--|--|--|--|--|--|--|--|--|--|--|--|--|--|--|--|--|--|--|--|--|--|--|--|--|--|--|--|--|--|--|--|--|--|--|--|--|--|--|--|--|--|--|--|--|--|--|--|--|--|--|--|--|--|--|--|--|--|--|--|--|--|--|--|--|--|--|--|--|--|--|--|--|--|--|--|--|--|--|--|--|--|--|--|--|--|--|--|--|--|--|--|--|--|--|--|--|--|--|--|--|--|--|--|--|--|--|--|--|--|--|--|--|--|--|--|--|--|--|--|--|--|--|--|--|--|--|--|--|--|--|--|--|--|--|--|--|--|--|--|--|--|--|--|--|--|--|--|--|--|--|--|--|--|--|--|--|--|--|--|--|--|--|--|--|--|--|--|--|--|--|--|--|--|--|--|--|--|--|--|--|--|--|--|--|--|--|--|--|--|--|--|--|--|--|--|--|--|--|--|--|--|--|--|--|--|--|--|--|--|--|--|--|--|--|--|--|--|--|--|--|--|--|--|--|--|--|--|--|--|--|--|--|--|--|--|--|--|--|--|--|--|--|--|--|--|--|--|--|--|--|--|--|--|--|--|--|--|--|--|--|--|--|--|--|--|--|--|--|--|--|--|--|--|--|--|--|--|--|--|--|--|--|--|--|--|--|--|--|--|--|--|--|--|--|--|--|--|--|--|--|--|--|--|--|--|--|--|--|--|--|--|--|--|--|--|--|--|--|--|--|--|--|--|--|--|--|--|--|--|--|--|--|--|--|--|--|--|--|--|--|--|--|--|--|--|--|--|--|--|--|--|--|--|--|--|--|--|--|--|--|--|--|--|--|--|--|--|--|--|--|--|--|--|--|--|--|--|--|--|--|--|--|--|--|--|--|--|--|--|--|--|--|--|--|--|--|--|--|--|--|--|--|--|--|--|--|--|--|--|--|--|--|--|--|--|--|--|--|--|--|--|--|--|--|--|--|--|--|--|--|--|--|--|--|--|--|--|--|--|--|--|--|--|--|--|--|--|--|--|--|--|--|--|--|--|--|--|--|--|--|--|--|--|--|--|--|--|--|--|--|--|--|--|--|--|--|--|--|--|--|--|--|--|--|--|--|--|--|--|--|--|--|--|--|--|--|--|--|--|--|--|--|--|--|--|--|--|--|--|--|--|--|--|--|--|--|--|--|--|--|--|--|--|--|--|--|--|--|--|--|--|--|--|--|--|--|--|--|--|--|--|--|--|--|--|--|--|--|--|--|--|--|--|--|--|--|--|--|--|--|--|--|--|--|--|--|--|--|--|--|--|--|--|--|--|--|--|--|--|--|--|--|--|--|--|--|--|--|--|--|--|--|--|--|--|--|--|--|--|--|--|--|--|--|--|--|--|--|--|--|--|--|--|--|--|--|--|--|--|--|--|--|--|--|--|--|--|--|--|--|--|--|--|--|--|--|--|--|--|--|--|--|--|--|--|--|--|--|--|--|--|--|--|--|--|--|--|--|--|--|--|--|--|--|--|--|--|--|--|--|--|--|--|--|--|--|--|--|--|--|--|--|--|--|--|--|--|--|--|--|--|--|--|--|--|--|--|--|--|--|--|--|--|--|--|--|--|--|--|--|--|--|--|--|--|--|--|--|--|--|--|--|--|--|--|--|--|--|--|--|--|--|--|--|--|--|--|--|----|
|  |  |  |  |  |  |  |  |  |  |  |  |  |  |  |  |  |  |  |  |  |  |  |  |  |  |  |  |  |  |  |  |  |  |  |  |  |  |  |  |  |  |  |  |  |  |  |  |  |  |  |  |  |  |  |  |  |  |  |  |  |  |  |  |  |  |  |  |  |  |  |  |  |  |  |  |  |  |  |  |  |  |  |  |  |  |  |  |  |  |  |  |  |  |  |  |  |  |  |  |  |  |  |  |  |  |  |  |  |  |  |  |  |  |  |  |  |  |  |  |  |  |  |  |  |  |  |  |  |  |  |  |  |  |  |  |  |  |  |  |  |  |  |  |  |  |  |  |  |  |  |  |  |  |  |  |  |  |  |  |  |  |  |  |  |  |  |  |  |  |  |  |  |  |  |  |  |  |  |  |  |  |  |  |  |  |  |  |  |  |  |  |  |  |  |  |  |  |  |  |  |  |  |  |  |  |  |  |  |  |  |  |  |  |  |  |  |  |  |  |  |  |  |  |  |  |  |  |  |  |  |  |  |  |  |  |  |  |  |  |  |  |  |  |  |  |  |  |  |  |  |  |  |  |  |  |  |  |  |  |  |  |  |  |  |  |  |  |  |  |  |  |  |  |  |  |  |  |  |  |  |  |  |  |  |  |  |  |  |  |  |  |  |  |  |  |  |  |  |  |  |  |  |  |  |  |  |  |  |  |  |  |  |  |  |  |  |  |  |  |  |  |  |  |  |  |  |  |  |  |  |  |  |  |  |  |  |  |  |  |  |  |  |  |  |  |  |  |  |  |  |  |  |  |  |  |  |  |  |  |  |  |  |  |  |  |  |  |  |  |  |  |  |  |  |  |  |  |  |  |  |  |  |  |  |  |  |  |  |  |  |  |  |  |  |  |  |  |  |  |  |  |  |  |  |  |  |  |  |  |  |  |  |  |  |  |  |  |  |  |  |  |  |  |  |  |  |  |  |  |  |  |  |  |  |  |  |  |  |  |  |  |  |  |  |  |  |  |  |  |  |  |  |  |  |  |  |  |  |  |  |  |  |  |  |  |  |  |  |  |  |  |  |  |  |  |  |  |  |  |  |  |  |  |  |  |  |  |  |  |  |  |  |  |  |  |  |  |  |  |  |  |  |  |  |  |  |  |  |  |  |  |  |  |  |  |  |  |  |  |  |  |  |  |  |  |  |  |  |  |  |  |  |  |  |  |  |  |  |  |  |  |  |  |  |  |  |  |  |  |  |  |  |  |  |  |  |  |  |  |  |  |  |  |  |  |  |  |  |  |  |  |  |  |  |  |  |  |  |  |  |  |  |  |  |  |  |  |  |  |  |  |  |  |  |  |  |  |  |  |  |  |  |  |  |  |  |  |  |  |  |  |  |  |  |  |  |  |  |  |  |  |  |  |  |  |  |  |  |  |  |  |  |  |  |  |  |  |  |  |  |  |  |  |  |  |  |  |  |  |  |  |  |  |  |  |  |  |  |  |  |  |  |  |  |  |  |  |  |  |  |  |  |  |  |  |  |  |  |  |  |  |  |  |  |  |  |  |  |  |  |  |  |  |  |  |  |  |  |  |  |  |  |  |  |  |  |  |  |  |  |  |  |  |  |  |  |  |  |  |  |  |  |  |  |  |  |  |  |  |  |  |  |  |  |  |  |  |  |  |  |  |  |  |  |  |  |  |  |  |  |  |  |  |  |  |  |  |  |  |  |  |  |  |  |  |  |  |  |  |  |  |  |  |  |  |  |  |  |  |  |  |  |  |  |  |  |  |  |  |  |  |  |  |  |  |  |  |  |  |  |  |  |  |  |  |  |  |  |  |  |  |  |  |  |  |  |  |  |  |  |  |  |  |  |  |  |  |  |  |  |  |  |  |  |  |  |  |  |  |  |  |  |  |  |  |  |  |  |  |  |  |  |  |  |  |  |  |  |  |  |  |  |  |  |  |  |  |  |  |  |  |  |  |  |  |  |  |  |  |  |  |  |  |  |  |  |  |  |  |  |  |  |  |  |  |  |  |  |  |  |  |  |  |  |  |  |  |  |  |  |  |  |  |  |  |  |  |  |  |  |  |  |  |  |  |  |  |  |  |  |  |  |  |  |  |  |  |  |  |  |  |  |  |  |  |  |  |  |  |  |  |  |  |  |  |  |  |  |  |  |  |  |  |  |  |  |  |  |  |  |  |  |  |  |  |  |  |  |  |  |  |  |  |  |  |  |  |  |  |  |  |  |  |  |  |  |  |  |  |  |  |  |  |  |  |  |  |  |  |  |  |  |  |  |  |  |  |  |  |  |  |  |  |  |  |  |  |  |  |  |  |  |  |  |  |  |  |  |  |  |  |  |  |  |  |  |  |  |  |  |  |  |  |  |  |  |  |  |  |  |  |  |  |  |  |  |  |  |  |  |  |  |  |  |  |  |  |  |  |  |  |  |  |  |  |  |  |  |  |  |  |  |  |  |  |  |  |  |  |  |  |  |  |  |  |  |  |  |  |  |  |  |  |  |  |  |  |  |  |  |  |  |  |  |  |  |  |  |  |  |  |  |  |  |  |  |  |  |  |  |  |  |  |  |  |  |  |  |  |  |  |  |  |  |  |  |  |  |  |  |  |  |  |  |  |  |  |  |  |  |  |  |  |  |  |  |  |  |  |  |  |  |  |  |  |  |  |  |  |  |  |  |  |  |  |  |  |  |  |  |  |  |  |  |  |  |  |  |  |  |  |  |  |  |  |  |  |  |  |  |  |  |  |  |  |  |  |  |  |  |  |  |  |  |  |  |  |  |  |  |  |  |  |  |  |  |  |  |  |  |  |  |  |  |  |  |  |  |  |  |  |  |  |  |  |  |  |  |  |  |  |  |  |  |  |  |  |  |  |  |  |  |  |  |  |  |  |  |  |  |  |  |  |  |  |  |  |  |  |  |  |  |  |  |  |  |  |  |  |  |  |  |  |  |  |  |  |  |  |  |  |  |  |  |  |  |  |  |  |  |  |  |  |  |  |  |  |  |  |  |  |  |  |  |  |  |  |  |  |  |  |  |  |  |  |  |  |  |  |  |  |  |  |  |  |  |  |  |  |  |  |  |  |  |  |  |  |  |  |  |  |  |  |  |  |  |  |  |  |  |  |  |  |  |  |  |  |  |  |  |  |  |  |  |  |  |  |  |  |  |  |  |  |  |  |  |  |  |  |  |  |  |  |  |  | </ |
|--|--|--|--|--|--|--|--|--|--|--|--|--|--|--|--|--|--|--|--|--|--|--|--|--|--|--|--|--|--|--|--|--|--|--|--|--|--|--|--|--|--|--|--|--|--|--|--|--|--|--|--|--|--|--|--|--|--|--|--|--|--|--|--|--|--|--|--|--|--|--|--|--|--|--|--|--|--|--|--|--|--|--|--|--|--|--|--|--|--|--|--|--|--|--|--|--|--|--|--|--|--|--|--|--|--|--|--|--|--|--|--|--|--|--|--|--|--|--|--|--|--|--|--|--|--|--|--|--|--|--|--|--|--|--|--|--|--|--|--|--|--|--|--|--|--|--|--|--|--|--|--|--|--|--|--|--|--|--|--|--|--|--|--|--|--|--|--|--|--|--|--|--|--|--|--|--|--|--|--|--|--|--|--|--|--|--|--|--|--|--|--|--|--|--|--|--|--|--|--|--|--|--|--|--|--|--|--|--|--|--|--|--|--|--|--|--|--|--|--|--|--|--|--|--|--|--|--|--|--|--|--|--|--|--|--|--|--|--|--|--|--|--|--|--|--|--|--|--|--|--|--|--|--|--|--|--|--|--|--|--|--|--|--|--|--|--|--|--|--|--|--|--|--|--|--|--|--|--|--|--|--|--|--|--|--|--|--|--|--|--|--|--|--|--|--|--|--|--|--|--|--|--|--|--|--|--|--|--|--|--|--|--|--|--|--|--|--|--|--|--|--|--|--|--|--|--|--|--|--|--|--|--|--|--|--|--|--|--|--|--|--|--|--|--|--|--|--|--|--|--|--|--|--|--|--|--|--|--|--|--|--|--|--|--|--|--|--|--|--|--|--|--|--|--|--|--|--|--|--|--|--|--|--|--|--|--|--|--|--|--|--|--|--|--|--|--|--|--|--|--|--|--|--|--|--|--|--|--|--|--|--|--|--|--|--|--|--|--|--|--|--|--|--|--|--|--|--|--|--|--|--|--|--|--|--|--|--|--|--|--|--|--|--|--|--|--|--|--|--|--|--|--|--|--|--|--|--|--|--|--|--|--|--|--|--|--|--|--|--|--|--|--|--|--|--|--|--|--|--|--|--|--|--|--|--|--|--|--|--|--|--|--|--|--|--|--|--|--|--|--|--|--|--|--|--|--|--|--|--|--|--|--|--|--|--|--|--|--|--|--|--|--|--|--|--|--|--|--|--|--|--|--|--|--|--|--|--|--|--|--|--|--|--|--|--|--|--|--|--|--|--|--|--|--|--|--|--|--|--|--|--|--|--|--|--|--|--|--|--|--|--|--|--|--|--|--|--|--|--|--|--|--|--|--|--|--|--|--|--|--|--|--|--|--|--|--|--|--|--|--|--|--|--|--|--|--|--|--|--|--|--|--|--|--|--|--|--|--|--|--|--|--|--|--|--|--|--|--|--|--|--|--|--|--|--|--|--|--|--|--|--|--|--|--|--|--|--|--|--|--|--|--|--|--|--|--|--|--|--|--|--|--|--|--|--|--|--|--|--|--|--|--|--|--|--|--|--|--|--|--|--|--|--|--|--|--|--|--|--|--|--|--|--|--|--|--|--|--|--|--|--|--|--|--|--|--|--|--|--|--|--|--|--|--|--|--|--|--|--|--|--|--|--|--|--|--|--|--|--|--|--|--|--|--|--|--|--|--|--|--|--|--|--|--|--|--|--|--|--|--|--|--|--|--|--|--|--|--|--|--|--|--|--|--|--|--|--|--|--|--|--|--|--|--|--|--|--|--|--|--|--|--|--|--|--|--|--|--|--|--|--|--|--|--|--|--|--|--|--|--|--|--|--|--|--|--|--|--|--|--|--|--|--|--|--|--|--|--|--|--|--|--|--|--|--|--|--|--|--|--|--|--|--|--|--|--|--|--|--|--|--|--|--|--|--|--|--|--|--|--|--|--|--|--|--|--|--|--|--|--|--|--|--|--|--|--|--|--|--|--|--|--|--|--|--|--|--|--|--|--|--|--|--|--|--|--|--|--|--|--|--|--|--|--|--|--|--|--|--|--|--|--|--|--|--|--|--|--|--|--|--|--|--|--|--|--|--|--|--|--|--|--|--|--|--|--|--|--|--|--|--|--|--|--|--|--|--|--|--|--|--|--|--|--|--|--|--|--|--|--|--|--|--|--|--|--|--|--|--|--|--|--|--|--|--|--|--|--|--|--|--|--|--|--|--|--|--|--|--|--|--|--|--|--|--|--|--|--|--|--|--|--|--|--|--|--|--|--|--|--|--|--|--|--|--|--|--|--|--|--|--|--|--|--|--|--|--|--|--|--|--|--|--|--|--|--|--|--|--|--|--|--|--|--|--|--|--|--|--|--|--|--|--|--|--|--|--|--|--|--|--|--|--|--|--|--|--|--|--|--|--|--|--|--|--|--|--|--|--|--|--|--|--|--|--|--|--|--|--|--|--|--|--|--|--|--|--|--|--|--|--|--|--|--|--|--|--|--|--|--|--|--|--|--|--|--|--|--|--|--|--|--|--|--|--|--|--|--|--|--|--|--|--|--|--|--|--|--|--|--|--|--|--|--|--|--|--|--|--|--|--|--|--|--|--|--|--|--|--|--|--|--|--|--|--|--|--|--|--|--|--|--|--|--|--|--|--|--|--|--|--|--|--|--|--|--|--|--|--|--|--|--|--|--|--|--|--|--|--|--|--|--|--|--|--|--|--|--|--|--|--|--|--|--|--|--|--|--|--|--|--|--|--|--|--|--|--|--|--|--|--|--|--|--|--|--|--|--|--|--|--|--|--|--|--|--|--|--|--|--|--|--|--|--|--|--|--|--|--|--|--|--|--|--|--|--|--|--|--|--|--|--|--|--|--|--|--|--|--|--|--|--|--|--|--|--|--|--|--|--|--|--|--|--|--|--|--|--|--|--|--|--|--|--|--|--|--|--|--|--|--|--|--|--|--|--|--|--|--|--|--|--|--|--|--|--|--|--|--|--|--|--|--|--|--|--|--|--|--|--|--|--|--|--|--|--|--|--|--|--|--|--|--|--|--|--|--|--|--|--|--|--|--|--|--|--|--|--|--|--|--|--|--|--|--|--|--|--|--|--|--|--|--|--|--|--|--|--|--|--|--|--|--|--|--|--|--|--|--|--|--|--|--|--|--|--|--|--|--|--|--|--|--|--|--|--|--|--|--|--|--|--|--|--|--|--|--|--|--|--|--|--|--|--|--|----|

Table of marital\_status by RminusL

| Frequency                                       |       |       |       |       |       |       |    |  |  |  |  |
|-------------------------------------------------|-------|-------|-------|-------|-------|-------|----|--|--|--|--|
| Row                                             | Pct   |       |       |       |       |       |    |  |  |  |  |
| Col                                             | Pct   | -3    | -2    | -1    | 0     | 1     |    |  |  |  |  |
| 2                                               |       | 3     | Total |       |       |       |    |  |  |  |  |
| -----+-----+-----+-----+-----+-----+-----+----- |       |       |       |       |       |       |    |  |  |  |  |
| -+-----+                                        |       |       |       |       |       |       |    |  |  |  |  |
| Married                                         |       | 22    | 10    | 20    | 47    | 30    | 13 |  |  |  |  |
|                                                 | 38    | 180   |       |       |       |       |    |  |  |  |  |
|                                                 |       | 12.22 | 5.56  | 11.11 | 26.11 | 16.67 |    |  |  |  |  |
| 7.22                                            | 21.11 |       |       |       |       |       |    |  |  |  |  |
|                                                 |       | 68.75 | 62.50 | 62.50 | 58.02 | 62.50 |    |  |  |  |  |
| 61.90                                           | 60.32 |       |       |       |       |       |    |  |  |  |  |
| -----+-----+-----+-----+-----+-----+-----+----- |       |       |       |       |       |       |    |  |  |  |  |
| -+-----+                                        |       |       |       |       |       |       |    |  |  |  |  |
| Single                                          |       | 5     | 4     | 7     | 30    | 16    | 7  |  |  |  |  |
|                                                 | 17    | 86    |       |       |       |       |    |  |  |  |  |
|                                                 |       | 5.81  | 4.65  | 8.14  | 34.88 | 18.60 |    |  |  |  |  |
| 8.14                                            | 19.77 |       |       |       |       |       |    |  |  |  |  |
|                                                 |       | 15.63 | 25.00 | 21.88 | 37.04 | 33.33 |    |  |  |  |  |
| 33.33                                           | 26.98 |       |       |       |       |       |    |  |  |  |  |
| -----+-----+-----+-----+-----+-----+-----+----- |       |       |       |       |       |       |    |  |  |  |  |
| -+-----+                                        |       |       |       |       |       |       |    |  |  |  |  |
| Divorced                                        |       | 4     | 1     | 5     | 4     | 2     | 1  |  |  |  |  |
|                                                 | 8     | 25    |       |       |       |       |    |  |  |  |  |
|                                                 |       | 16.00 | 4.00  | 20.00 | 16.00 | 8.00  |    |  |  |  |  |
| 4.00                                            | 32.00 |       |       |       |       |       |    |  |  |  |  |
|                                                 |       | 12.50 | 6.25  | 15.63 | 4.94  | 4.17  |    |  |  |  |  |
| 4.76                                            | 12.70 |       |       |       |       |       |    |  |  |  |  |

|         |        |        |      |      |      |    |
|---------|--------|--------|------|------|------|----|
|         |        |        |      |      |      |    |
|         |        |        |      |      |      |    |
|         |        |        |      |      |      |    |
| Widowed | 1      | 0      | 0    | 0    | 0    | 0  |
| 0       | 1      |        |      |      |      |    |
|         | 100.00 | 0.00   | 0.00 | 0.00 | 0.00 |    |
| 0.00    | 0.00   |        |      |      |      |    |
|         | 3.13   | 0.00   | 0.00 | 0.00 | 0.00 |    |
| 0.00    | 0.00   |        |      |      |      |    |
|         |        |        |      |      |      |    |
|         |        |        |      |      |      |    |
|         |        |        |      |      |      |    |
| Other   | 0      | 1      | 0    | 0    | 0    | 0  |
| 0       | 1      |        |      |      |      |    |
|         | 0.00   | 100.00 | 0.00 | 0.00 | 0.00 |    |
| 0.00    | 0.00   |        |      |      |      |    |
|         | 0.00   | 6.25   | 0.00 | 0.00 | 0.00 |    |
| 0.00    | 0.00   |        |      |      |      |    |
|         |        |        |      |      |      |    |
|         |        |        |      |      |      |    |
|         |        |        |      |      |      |    |
| Total   | 32     | 16     | 32   | 81   | 48   | 21 |
| 63      | 293    |        |      |      |      |    |

Frequency Missing = 257

Table of education by RminusL

education(Education) RminusL

|                  |       |       |      |       |      |  |
|------------------|-------|-------|------|-------|------|--|
| Frequency        |       |       |      |       |      |  |
| Row Pct          |       |       |      |       |      |  |
| Col Pct          | -3    | -2    | -1   | 0     | 1    |  |
| 2                | 3     | Total |      |       |      |  |
|                  |       |       |      |       |      |  |
|                  |       |       |      |       |      |  |
|                  |       |       |      |       |      |  |
| Some high school | 0     | 0     | 0    | 3     | 0    |  |
| 0                | 1     | 4     |      |       |      |  |
| or less          | 0.00  | 0.00  | 0.00 | 75.00 | 0.00 |  |
| 0.00             | 25.00 |       |      |       |      |  |
|                  | 0.00  | 0.00  | 0.00 | 4.35  | 0.00 |  |
| 0.00             | 1.61  |       |      |       |      |  |
|                  |       |       |      |       |      |  |
|                  |       |       |      |       |      |  |
|                  |       |       |      |       |      |  |
| High school grad | 5     | 5     | 8    | 5     | 7    |  |
| 2                | 8     | 40    |      |       |      |  |



|                                     |       |       |       |       |       |
|-------------------------------------|-------|-------|-------|-------|-------|
| uate or GED                         | 12.50 | 12.50 | 20.00 | 12.50 | 17.50 |
| 5.00   20.00                        |       |       |       |       |       |
|                                     | 20.83 | 41.67 | 26.67 | 7.25  | 16.28 |
| 11.11   12.90                       |       |       |       |       |       |
| -----+-----+-----+-----+-----+----- |       |       |       |       |       |
| +-----+-----+                       |       |       |       |       |       |
| Some college                        | 4     | 2     | 7     | 19    | 7     |
| 4   17   60                         |       |       |       |       |       |
|                                     | 6.67  | 3.33  | 11.67 | 31.67 | 11.67 |
| 6.67   28.33                        |       |       |       |       |       |
|                                     | 16.67 | 16.67 | 23.33 | 27.54 | 16.28 |
| 22.22   27.42                       |       |       |       |       |       |
| -----+-----+-----+-----+-----+----- |       |       |       |       |       |
| +-----+-----+                       |       |       |       |       |       |
| Graduate or coll                    | 15    | 5     | 15    | 42    | 29    |
| 12   36   154                       |       |       |       |       |       |
| ege or postgradu                    | 9.74  | 3.25  | 9.74  | 27.27 | 18.83 |
| 7.79   23.38                        |       |       |       |       |       |
| ate degree                          | 62.50 | 41.67 | 50.00 | 60.87 | 67.44 |
| 66.67   58.06                       |       |       |       |       |       |
| -----+-----+-----+-----+-----+----- |       |       |       |       |       |
| +-----+-----+                       |       |       |       |       |       |
| Total                               | 24    | 12    | 30    | 69    | 43    |
| 18 62 258                           |       |       |       |       |       |

Frequency Missing = 292

Table of employment by RminusL

|                                     |       |         |       |       |       |    |
|-------------------------------------|-------|---------|-------|-------|-------|----|
| employment(Employment status)       |       | RminusL |       |       |       |    |
| Frequency                           |       |         |       |       |       |    |
| Row Pct                             |       |         |       |       |       |    |
| Col Pct                             | -3    | -2      | -1    | 0     | 1     |    |
| 2   3   Total                       |       |         |       |       |       |    |
| -----+-----+-----+-----+-----+----- |       |         |       |       |       |    |
| ---+-----+                          |       |         |       |       |       |    |
| Employed                            | 24    | 5       | 15    | 46    | 29    | 12 |
| 38   169                            |       |         |       |       |       |    |
|                                     | 14.20 | 2.96    | 8.88  | 27.22 | 17.16 |    |
| 7.10   22.49                        |       |         |       |       |       |    |
|                                     | 85.71 | 45.45   | 51.72 | 65.71 | 67.44 |    |
| 75.00   66.67                       |       |         |       |       |       |    |

[illegible]

Frequency Missing = 296

Table of headache\_dx by RminusL

| headache_dx(Principle Headache Diagnosis) |       | RminusL |        |       |       |       |
|-------------------------------------------|-------|---------|--------|-------|-------|-------|
| Frequency                                 |       |         |        |       |       |       |
| Row Pct                                   |       |         |        |       |       |       |
| Col Pct                                   |       | -3      | -2     | -1    | 0     | 1     |
| 2                                         | 3     | Total   |        |       |       |       |
| -----+-----+-----+-----+-----+-----       |       |         |        |       |       |       |
| +-----+-----+                             |       |         |        |       |       |       |
| Migraine                                  |       | 24      | 17     | 33    | 80    | 47    |
| 22                                        | 50    | 273     |        |       |       |       |
|                                           |       | 8.79    | 6.23   | 12.09 | 29.30 | 17.22 |
| 8.06                                      | 18.32 |         |        |       |       |       |
|                                           |       | 75.00   | 100.00 | 94.29 | 97.56 | 97.92 |
| 100.00                                    | 78.13 |         |        |       |       |       |
| -----+-----+-----+-----+-----+-----       |       |         |        |       |       |       |
| +-----+-----+                             |       |         |        |       |       |       |
| Cluster Headache                          |       | 5       | 0      | 2     | 2     | 1     |
|                                           | 0     | 12      | 22     |       |       |       |
|                                           |       | 22.73   | 0.00   | 9.09  | 9.09  | 4.55  |
| 0.00                                      | 54.55 |         |        |       |       |       |
|                                           |       | 15.63   | 0.00   | 5.71  | 2.44  | 2.08  |
| 0.00                                      | 18.75 |         |        |       |       |       |
| -----+-----+-----+-----+-----+-----       |       |         |        |       |       |       |
| +-----+-----+                             |       |         |        |       |       |       |
| Hemicrania conti                          |       | 3       | 0      | 0     | 0     | 0     |
|                                           | 0     | 2       | 5      |       |       |       |
| nua                                       |       | 60.00   | 0.00   | 0.00  | 0.00  | 0.00  |
| 0.00                                      | 40.00 |         |        |       |       |       |
|                                           |       | 9.38    | 0.00   | 0.00  | 0.00  | 0.00  |
| 0.00                                      | 3.13  |         |        |       |       |       |
| -----+-----+-----+-----+-----+-----       |       |         |        |       |       |       |
| +-----+-----+                             |       |         |        |       |       |       |
| Total                                     |       | 32      | 17     | 35    | 82    | 48    |
| 22                                        | 64    | 300     |        |       |       |       |

Frequency Missing = 250

# Table of hand by RminusL

hand(Handedness) RminusL

| Frequency                           |       |     |       |       |        |        |       |    |  |
|-------------------------------------|-------|-----|-------|-------|--------|--------|-------|----|--|
| Row Pct                             |       |     |       |       |        |        |       |    |  |
| Col Pct                             |       |     | -3    | -2    | -1     | 0      | 1     |    |  |
|                                     | 2     | 3   | Total |       |        |        |       |    |  |
| -----+-----+-----+-----+-----+----- |       |     |       |       |        |        |       |    |  |
| +-----+-----+                       |       |     |       |       |        |        |       |    |  |
| Left                                |       |     | 7     | 2     | 0      | 9      | 2     | 0  |  |
|                                     | 7     | 27  |       |       |        |        |       |    |  |
|                                     |       |     | 25.93 | 7.41  | 0.00   | 33.33  | 7.41  |    |  |
| 0.00                                | 25.93 |     |       |       |        |        |       |    |  |
|                                     |       |     | 25.00 | 13.33 | 0.00   | 11.69  | 4.88  |    |  |
| 0.00                                | 11.86 |     |       |       |        |        |       |    |  |
| -----+-----+-----+-----+-----+----- |       |     |       |       |        |        |       |    |  |
| +-----+-----+                       |       |     |       |       |        |        |       |    |  |
| Right                               |       |     | 21    | 13    | 29     | 67     | 39    | 20 |  |
|                                     | 52    | 241 |       |       |        |        |       |    |  |
|                                     |       |     | 8.71  | 5.39  | 12.03  | 27.80  | 16.18 |    |  |
| 8.30                                | 21.58 |     |       |       |        |        |       |    |  |
|                                     |       |     | 75.00 | 86.67 | 100.00 | 87.01  | 95.12 |    |  |
| 100.00                              | 88.14 |     |       |       |        |        |       |    |  |
| -----+-----+-----+-----+-----+----- |       |     |       |       |        |        |       |    |  |
| +-----+-----+                       |       |     |       |       |        |        |       |    |  |
| Right preference                    |       |     | 0     | 0     | 0      | 0      | 0     |    |  |
|                                     | 0     | 0   | 0     |       |        |        |       |    |  |
|                                     |       |     | .     | .     | .      | .      | .     | .  |  |
|                                     | .     |     |       |       |        |        |       |    |  |
|                                     |       |     | 0.00  | 0.00  | 0.00   | 0.00   | 0.00  |    |  |
| 0.00                                | 0.00  |     |       |       |        |        |       |    |  |
| -----+-----+-----+-----+-----+----- |       |     |       |       |        |        |       |    |  |
| +-----+-----+                       |       |     |       |       |        |        |       |    |  |
| Ambidextrous                        |       |     | 0     | 0     | 0      | 1      | 0     |    |  |
|                                     | 0     | 0   | 1     |       |        |        |       |    |  |
|                                     |       |     | 0.00  | 0.00  | 0.00   | 100.00 | 0.00  |    |  |
| 0.00                                | 0.00  |     |       |       |        |        |       |    |  |
|                                     |       |     | 0.00  | 0.00  | 0.00   | 1.30   | 0.00  |    |  |
| 0.00                                | 0.00  |     |       |       |        |        |       |    |  |
| -----+-----+-----+-----+-----+----- |       |     |       |       |        |        |       |    |  |
| Total                               |       |     | 28    | 15    | 29     | 77     | 41    |    |  |
| 20                                  | 59    | 269 |       |       |        |        |       |    |  |

Frequency Missing = 281

~~~~~

Jonckheere-Terpstra Test for trend p-values for the binary variables with RminusL

|                                   |        |
|-----------------------------------|--------|
| Table sex * RminusL               | 0.0483 |
| Table White * RminusL             | 0.9163 |
| Table ethnicity * RminusL         | 0.3976 |
| Table Married * RminusL           | 0.6294 |
| Table CollegeGrad * RminusL       | 0.4825 |
| Table Employed * RminusL          | 0.9359 |
| Table aura * RminusL              | 0.5733 |
| Table MigraineDx * RminusL        | 0.3394 |
| Table RightHanded * RminusL       | 0.2119 |
| Table Substance * RminusL         | 0.6522 |
| Table Anxiety * RminusL           | 0.3231 |
| Table Depression * RminusL        | 0.4610 |
| Table Bipolar * RminusL           | 0.7127 |
| Table Eating * RminusL            | 0.5542 |
| Table Psychotic * RminusL         | 0.1076 |
| Table PTSD * RminusL              | 0.0058 |
| Table OpioidsPrior * RminusL      | 0.5525 |
| Table BarbituratesPrior * RminusL | 0.3751 |
| Table TriptansPrior * RminusL     | 0.4989 |
| Table OpioidsPost * RminusL       | 0.5615 |
| Table BarbituratesPost * RminusL  | 0.3041 |
| Table TriptansPost * RminusL      | 0.5092 |

Correlation of education and RminusL is 0.06506, p=0.2979, n=258.

The analyses below help to see the direction of the PTSD trend:

Analysis Variable : RminusL Left would be more negative and right would be more positive:

| PTSD    | Obs | Mean    | Std Dev | N | Median |
|---------|-----|---------|---------|---|--------|
| Minimum |     | Maximum |         |   |        |
| -----   |     |         |         |   |        |
| -----   |     |         |         |   |        |

|            |            |            |            |           |     |
|------------|------------|------------|------------|-----------|-----|
|            | 0          | 521        | 0.4683099  | 1.8653572 | 284 |
| 0          | -3.0000000 |            | 3.0000000  |           |     |
|            | 1          | 29         | -0.8750000 | 1.7078251 | 16  |
| -0.5000000 |            | -3.0000000 | 3.0000000  |           |     |

PTSD sufferers differ from nonPTSD individuals whereby sufferers are on the left side on average, and non-sufferers are slightly on the right. Same can be seen in the crosstabulation above ( $p < 0.01$ ). Note that the N with PTSD is only 16.

# MIGRAINE DX only

Table of sex by RminusL

| sex(Sex)  |       | RminusL |       |       |       |       |  |
|-----------|-------|---------|-------|-------|-------|-------|--|
| Frequency |       |         |       |       |       |       |  |
| Row Pct   |       |         |       |       |       |       |  |
| Col Pct   |       | -3      | -2    | -1    | 0     | 1     |  |
|           | 2     | 3       | Total |       |       |       |  |
| Female    | 23    | 15      | 30    | 73    | 43    | 17    |  |
|           | 45    | 246     |       |       |       |       |  |
|           |       | 9.35    | 6.10  | 12.20 | 29.67 | 17.48 |  |
| 6.91      | 18.29 |         |       |       |       |       |  |
|           |       | 95.83   | 88.24 | 90.91 | 91.25 | 91.49 |  |
| 77.27     | 90.00 |         |       |       |       |       |  |

|  |  |  |  |  |  |  |  |  |  |
|--|--|--|--|--|--|--|--|--|--|
|  |  |  |  |  |  |  |  |  |  |
|  |  |  |  |  |  |  |  |  |  |
|  |  |  |  |  |  |  |  |  |  |
|  |  |  |  |  |  |  |  |  |  |
|  |  |  |  |  |  |  |  |  |  |
|  |  |  |  |  |  |  |  |  |  |
|  |  |  |  |  |  |  |  |  |  |
|  |  |  |  |  |  |  |  |  |  |
|  |  |  |  |  |  |  |  |  |  |
|  |  |  |  |  |  |  |  |  |  |
|  |  |  |  |  |  |  |  |  |  |
|  |  |  |  |  |  |  |  |  |  |
|  |  |  |  |  |  |  |  |  |  |
|  |  |  |  |  |  |  |  |  |  |
|  |  |  |  |  |  |  |  |  |  |
|  |  |  |  |  |  |  |  |  |  |
|  |  |  |  |  |  |  |  |  |  |
|  |  |  |  |  |  |  |  |  |  |
|  |  |  |  |  |  |  |  |  |  |
|  |  |  |  |  |  |  |  |  |  |
|  |  |  |  |  |  |  |  |  |  |
|  |  |  |  |  |  |  |  |  |  |
|  |  |  |  |  |  |  |  |  |  |
|  |  |  |  |  |  |  |  |  |  |
|  |  |  |  |  |  |  |  |  |  |
|  |  |  |  |  |  |  |  |  |  |
|  |  |  |  |  |  |  |  |  |  |
|  |  |  |  |  |  |  |  |  |  |
|  |  |  |  |  |  |  |  |  |  |
|  |  |  |  |  |  |  |  |  |  |
|  |  |  |  |  |  |  |  |  |  |
|  |  |  |  |  |  |  |  |  |  |
|  |  |  |  |  |  |  |  |  |  |
|  |  |  |  |  |  |  |  |  |  |
|  |  |  |  |  |  |  |  |  |  |
|  |  |  |  |  |  |  |  |  |  |
|  |  |  |  |  |  |  |  |  |  |
|  |  |  |  |  |  |  |  |  |  |
|  |  |  |  |  |  |  |  |  |  |
|  |  |  |  |  |  |  |  |  |  |
|  |  |  |  |  |  |  |  |  |  |
|  |  |  |  |  |  |  |  |  |  |
|  |  |  |  |  |  |  |  |  |  |
|  |  |  |  |  |  |  |  |  |  |
|  |  |  |  |  |  |  |  |  |  |
|  |  |  |  |  |  |  |  |  |  |
|  |  |  |  |  |  |  |  |  |  |
|  |  |  |  |  |  |  |  |  |  |
|  |  |  |  |  |  |  |  |  |  |
|  |  |  |  |  |  |  |  |  |  |
|  |  |  |  |  |  |  |  |  |  |
|  |  |  |  |  |  |  |  |  |  |
|  |  |  |  |  |  |  |  |  |  |
|  |  |  |  |  |  |  |  |  |  |
|  |  |  |  |  |  |  |  |  |  |
|  |  |  |  |  |  |  |  |  |  |
|  |  |  |  |  |  |  |  |  |  |
|  |  |  |  |  |  |  |  |  |  |
|  |  |  |  |  |  |  |  |  |  |
|  |  |  |  |  |  |  |  |  |  |
|  |  |  |  |  |  |  |  |  |  |
|  |  |  |  |  |  |  |  |  |  |
|  |  |  |  |  |  |  |  |  |  |
|  |  |  |  |  |  |  |  |  |  |
|  |  |  |  |  |  |  |  |  |  |
|  |  |  |  |  |  |  |  |  |  |
|  |  |  |  |  |  |  |  |  |  |
|  |  |  |  |  |  |  |  |  |  |
|  |  |  |  |  |  |  |  |  |  |
|  |  |  |  |  |  |  |  |  |  |
|  |  |  |  |  |  |  |  |  |  |
|  |  |  |  |  |  |  |  |  |  |
|  |  |  |  |  |  |  |  |  |  |
|  |  |  |  |  |  |  |  |  |  |
|  |  |  |  |  |  |  |  |  |  |
|  |  |  |  |  |  |  |  |  |  |
|  |  |  |  |  |  |  |  |  |  |
|  |  |  |  |  |  |  |  |  |  |
|  |  |  |  |  |  |  |  |  |  |
|  |  |  |  |  |  |  |  |  |  |
|  |  |  |  |  |  |  |  |  |  |
|  |  |  |  |  |  |  |  |  |  |
|  |  |  |  |  |  |  |  |  |  |
|  |  |  |  |  |  |  |  |  |  |
|  |  |  |  |  |  |  |  |  |  |
|  |  |  |  |  |  |  |  |  |  |
|  |  |  |  |  |  |  |  |  |  |
|  |  |  |  |  |  |  |  |  |  |
|  |  |  |  |  |  |  |  |  |  |
|  |  |  |  |  |  |  |  |  |  |
|  |  |  |  |  |  |  |  |  |  |
|  |  |  |  |  |  |  |  |  |  |
|  |  |  |  |  |  |  |  |  |  |
|  |  |  |  |  |  |  |  |  |  |
|  |  |  |  |  |  |  |  |  |  |
|  |  |  |  |  |  |  |  |  |  |
|  |  |  |  |  |  |  |  |  |  |
|  |  |  |  |  |  |  |  |  |  |
|  |  |  |  |  |  |  |  |  |  |
|  |  |  |  |  |  |  |  |  |  |
|  |  |  |  |  |  |  |  |  |  |
|  |  |  |  |  |  |  |  |  |  |
|  |  |  |  |  |  |  |  |  |  |
|  |  |  |  |  |  |  |  |  |  |
|  |  |  |  |  |  |  |  |  |  |
|  |  |  |  |  |  |  |  |  |  |
|  |  |  |  |  |  |  |  |  |  |
|  |  |  |  |  |  |  |  |  |  |
|  |  |  |  |  |  |  |  |  |  |
|  |  |  |  |  |  |  |  |  |  |
|  |  |  |  |  |  |  |  |  |  |
|  |  |  |  |  |  |  |  |  |  |
|  |  |  |  |  |  |  |  |  |  |
|  |  |  |  |  |  |  |  |  |  |
|  |  |  |  |  |  |  |  |  |  |
|  |  |  |  |  |  |  |  |  |  |
|  |  |  |  |  |  |  |  |  |  |
|  |  |  |  |  |  |  |  |  |  |
|  |  |  |  |  |  |  |  |  |  |
|  |  |  |  |  |  |  |  |  |  |
|  |  |  |  |  |  |  |  |  |  |
|  |  |  |  |  |  |  |  |  |  |
|  |  |  |  |  |  |  |  |  |  |
|  |  |  |  |  |  |  |  |  |  |
|  |  |  |  |  |  |  |  |  |  |
|  |  |  |  |  |  |  |  |  |  |
|  |  |  |  |  |  |  |  |  |  |
|  |  |  |  |  |  |  |  |  |  |
|  |  |  |  |  |  |  |  |  |  |
|  |  |  |  |  |  |  |  |  |  |
|  |  |  |  |  |  |  |  |  |  |
|  |  |  |  |  |  |  |  |  |  |
|  |  |  |  |  |  |  |  |  |  |
|  |  |  |  |  |  |  |  |  |  |
|  |  |  |  |  |  |  |  |  |  |
|  |  |  |  |  |  |  |  |  |  |
|  |  |  |  |  |  |  |  |  |  |
|  |  |  |  |  |  |  |  |  |  |
|  |  |  |  |  |  |  |  |  |  |
|  |  |  |  |  |  |  |  |  |  |
|  |  |  |  |  |  |  |  |  |  |
|  |  |  |  |  |  |  |  |  |  |
|  |  |  |  |  |  |  |  |  |  |
|  |  |  |  |  |  |  |  |  |  |
|  |  |  |  |  |  |  |  |  |  |
|  |  |  |  |  |  |  |  |  |  |
|  |  |  |  |  |  |  |  |  |  |
|  |  |  |  |  |  |  |  |  |  |
|  |  |  |  |  |  |  |  |  |  |
|  |  |  |  |  |  |  |  |  |  |
|  |  |  |  |  |  |  |  |  |  |
|  |  |  |  |  |  |  |  |  |  |
|  |  |  |  |  |  |  |  |  |  |
|  |  |  |  |  |  |  |  |  |  |
|  |  |  |  |  |  |  |  |  |  |
|  |  |  |  |  |  |  |  |  |  |
|  |  |  |  |  |  |  |  |  |  |
|  |  |  |  |  |  |  |  |  |  |
|  |  |  |  |  |  |  |  |  |  |
|  |  |  |  |  |  |  |  |  |  |
|  |  |  |  |  |  |  |  |  |  |
|  |  |  |  |  |  |  |  |  |  |
|  |  |  |  |  |  |  |  |  |  |
|  |  |  |  |  |  |  |  |  |  |
|  |  |  |  |  |  |  |  |  |  |
|  |  |  |  |  |  |  |  |  |  |
|  |  |  |  |  |  |  |  |  |  |
|  |  |  |  |  |  |  |  |  |  |
|  |  |  |  |  |  |  |  |  |  |
|  |  |  |  |  |  |  |  |  |  |
|  |  |  |  |  |  |  |  |  |  |
|  |  |  |  |  |  |  |  |  |  |
|  |  |  |  |  |  |  |  |  |  |
|  |  |  |  |  |  |  |  |  |  |
|  |  |  |  |  |  |  |  |  |  |
|  |  |  |  |  |  |  |  |  |  |
|  |  |  |  |  |  |  |  |  |  |
|  |  |  |  |  |  |  |  |  |  |
|  |  |  |  |  |  |  |  |  |  |
|  |  |  |  |  |  |  |  |  |  |
|  |  |  |  |  |  |  |  |  |  |
|  |  |  |  |  |  |  |  |  |  |
|  |  |  |  |  |  |  |  |  |  |
|  |  |  |  |  |  |  |  |  |  |
|  |  |  |  |  |  |  |  |  |  |
|  |  |  |  |  |  |  |  |  |  |
|  |  |  |  |  |  |  |  |  |  |
|  |  |  |  |  |  |  |  |  |  |
|  |  |  |  |  |  |  |  |  |  |
|  |  |  |  |  |  |  |  |  |  |
|  |  |  |  |  |  |  |  |  |  |
|  |  |  |  |  |  |  |  |  |  |
|  |  |  |  |  |  |  |  |  |  |
|  |  |  |  |  |  |  |  |  |  |
|  |  |  |  |  |  |  |  |  |  |
|  |  |  |  |  |  |  |  |  |  |
|  |  |  |  |  |  |  |  |  |  |
|  |  |  |  |  |  |  |  |  |  |
|  |  |  |  |  |  |  |  |  |  |
|  |  |  |  |  |  |  |  |  |  |
|  |  |  |  |  |  |  |  |  |  |
|  |  |  |  |  |  |  |  |  |  |
|  |  |  |  |  |  |  |  |  |  |
|  |  |  |  |  |  |  |  |  |  |
|  |  |  |  |  |  |  |  |  |  |
|  |  |  |  |  |  |  |  |  |  |
|  |  |  |  |  |  |  |  |  |  |
|  |  |  |  |  |  |  |  |  |  |
|  |  |  |  |  |  |  |  |  |  |
|  |  |  |  |  |  |  |  |  |  |
|  |  |  |  |  |  |  |  |  |  |
|  |  |  |  |  |  |  |  |  |  |
|  |  |  |  |  |  |  |  |  |  |
|  |  |  |  |  |  |  |  |  |  |
|  |  |  |  |  |  |  |  |  |  |
|  |  |  |  |  |  |  |  |  |  |
|  |  |  |  |  |  |  |  |  |  |
|  |  |  |  |  |  |  |  |  |  |
|  |  |  |  |  |  |  |  |  |  |
|  |  |  |  |  |  |  |  |  |  |
|  |  |  |  |  |  |  |  |  |  |
|  |  |  |  |  |  |  |  |  |  |
|  |  |  |  |  |  |  |  |  |  |
|  |  |  |  |  |  |  |  |  |  |
|  |  |  |  |  |  |  |  |  |  |
|  |  |  |  |  |  |  |  |  |  |
|  |  |  |  |  |  |  |  |  |  |
|  |  |  |  |  |  |  |  |  |  |
|  |  |  |  |  |  |  |  |  |  |
|  |  |  |  |  |  |  |  |  |  |
|  |  |  |  |  |  |  |  |  |  |
|  |  |  |  |  |  |  |  |  |  |
|  |  |  |  |  |  |  |  |  |  |
|  |  |  |  |  |  |  |  |  |  |
|  |  |  |  |  |  |  |  |  |  |
|  |  |  |  |  |  |  |  |  |  |
|  |  |  |  |  |  |  |  |  |  |
|  |  |  |  |  |  |  |  |  |  |
|  |  |  |  |  |  |  |  |  |  |
|  |  |  |  |  |  |  |  |  |  |
|  |  |  |  |  |  |  |  |  |  |
|  |  |  |  |  |  |  |  |  |  |
|  |  |  |  |  |  |  |  |  |  |
|  |  |  |  |  |  |  |  |  |  |
|  |  |  |  |  |  |  |  |  |  |
|  |  |  |  |  |  |  |  |  |  |
|  |  |  |  |  |  |  |  |  |  |
|  |  |  |  |  |  |  |  |  |  |
|  |  |  |  |  |  |  |  |  |  |
|  |  |  |  |  |  |  |  |  |  |
|  |  |  |  |  |  |  |  |  |  |
|  |  |  |  |  |  |  |  |  |  |
|  |  |  |  |  |  |  |  |  |  |
|  |  |  |  |  |  |  |  |  |  |
|  |  |  |  |  |  |  |  |  |  |
|  |  |  |  |  |  |  |  |  |  |
|  |  |  |  |  |  |  |  |  |  |
|  |  |  |  |  |  |  |  |  |  |
|  |  |  |  |  |  |  |  |  |  |
|  |  |  |  |  |  |  |  |  |  |
|  |  |  |  |  |  |  |  |  |  |
|  |  |  |  |  |  |  |  |  |  |
|  |  |  |  |  |  |  |  |  |  |
|  |  |  |  |  |  |  |  |  |  |
|  |  |  |  |  |  |  |  |  |  |
|  |  |  |  |  |  |  |  |  |  |
|  |  |  |  |  |  |  |  |  |  |
|  |  |  |  |  |  |  |  |  |  |
|  |  |  |  |  |  |  |  |  |  |
|  |  |  |  |  |  |  |  |  |  |
|  |  |  |  |  |  |  |  |  |  |
|  |  |  |  |  |  |  |  |  |  |
|  |  |  |  |  |  |  |  |  |  |
|  |  |  |  |  |  |  |  |  |  |
|  |  |  |  |  |  |  |  |  |  |
|  |  |  |  |  |  |  |  |  |  |
|  |  |  |  |  |  |  |  |  |  |
|  |  |  |  |  |  |  |  |  |  |
|  |  |  |  |  |  |  |  |  |  |
|  |  |  |  |  |  |  |  |  |  |
|  |  |  |  |  |  |  |  |  |  |
|  |  |  |  |  |  |  |  |  |  |
|  |  |  |  |  |  |  |  |  |  |
|  |  |  |  |  |  |  |  |  |  |
|  |  |  |  |  |  |  |  |  |  |
|  |  |  |  |  |  |  |  |  |  |
|  |  |  |  |  |  |  |  |  |  |
|  |  |  |  |  |  |  |  |  |  |
|  |  |  |  |  |  |  |  |  |  |
|  |  |  |  |  |  |  |  |  |  |
|  |  |  |  |  |  |  |  |  |  |
|  |  |  |  |  |  |  |  |  |  |
|  |  |  |  |  |  |  |  |  |  |
|  |  |  |  |  |  |  |  |  |  |
|  |  |  |  |  |  |  |  |  |  |
|  |  |  |  |  |  |  |  |  |  |
|  |  |  |  |  |  |  |  |  |  |
|  |  |  |  |  |  |  |  |  |  |
|  |  |  |  |  |  |  |  |  |  |
|  |  |  |  |  |  |  |  |  |  |
|  |  |  |  |  |  |  |  |  |  |
|  |  |  |  |  |  |  |  |  |  |
|  |  |  |  |  |  |  |  |  |  |
|  |  |  |  |  |  |  |  |  |  |
|  |  |  |  |  |  |  |  |  |  |
|  |  |  |  |  |  |  |  |  |  |
|  |  |  |  |  |  |  |  |  |  |
|  |  |  |  |  |  |  |  |  |  |
|  |  |  |  |  |  |  |  |  |  |
|  |  |  |  |  |  |  |  |  |  |
|  |  |  |  |  |  |  |  |  |  |
|  |  |  |  |  |  |  |  |  |  |
|  |  |  |  |  |  |  |  |  |  |
|  |  |  |  |  |  |  |  |  |  |
|  |  |  |  |  |  |  |  |  |  |
|  |  |  |  |  |  |  |  |  |  |
|  |  |  |  |  |  |  |  |  |  |
|  |  |  |  |  |  |  |  |  |  |
|  |  |  |  |  |  |  |  |  |  |
|  |  |  |  |  |  |  |  |  |  |
|  |  |  |  |  |  |  |  |  |  |
|  |  |  |  |  |  |  |  |  |  |
|  |  |  |  |  |  |  |  |  |  |
|  |  |  |  |  |  |  |  |  |  |
|  |  |  |  |  |  |  |  |  |  |
|  |  |  |  |  |  |  |  |  |  |
|  |  |  |  |  |  |  |  |  |  |
|  |  |  |  |  |  |  |  |  |  |
|  |  |  |  |  |  |  |  |  |  |
|  |  |  |  |  |  |  |  |  |  |
|  |  |  |  |  |  |  |  |  |  |
|  |  |  |  |  |  |  |  |  |  |
|  |  |  |  |  |  |  |  |  |  |
|  |  |  |  |  |  |  |  |  |  |
|  |  |  |  |  |  |  |  |  |  |
|  |  |  |  |  |  |  |  |  |  |
|  |  |  |  |  |  |  |  |  |  |
|  |  |  |  |  |  |  |  |  |  |
|  |  |  |  |  |  |  |  |  |  |
|  |  |  |  |  |  |  |  |  |  |
|  |  |  |  |  |  |  |  |  |  |
|  |  |  |  |  |  |  |  |  |  |
|  |  |  |  |  |  |  |  |  |  |
|  |  |  |  |  |  |  |  |  |  |
|  |  |  |  |  |  |  |  |  |  |
|  |  |  |  |  |  |  |  |  |  |
|  |  |  |  |  |  |  |  |  |  |
|  |  |  |  |  |  |  |  |  |  |
|  |  |  |  |  |  |  |  |  |  |
|  |  |  |  |  |  |  |  |  |  |
|  |  |  |  |  |  |  |  |  |  |
|  |  |  |  |  |  |  |  |  |  |
|  |  |  |  |  |  |  |  |  |  |
|  |  |  |  |  |  |  |  |  |  |
|  |  |  |  |  |  |  |  |  |  |
|  |  |  |  |  |  |  |  |  |  |
|  |  |  |  |  |  |  |  |  |  |
|  |  |  |  |  |  |  |  |  |  |
|  |  |  |  |  |  |  |  |  |  |
|  |  |  |  |  |  |  |  |  |  |
|  |  |  |  |  |  |  |  |  |  |
|  |  |  |  |  |  |  |  |  |  |
|  |  |  |  |  |  |  |  |  |  |
|  |  |  |  |  |  |  |  |  |  |
|  |  |  |  |  |  |  |  |  |  |
|  |  |  |  |  |  |  |  |  |  |
|  |  |  |  |  |  |  |  |  |  |
|  |  |  |  |  |  |  |  |  |  |
|  |  |  |  |  |  |  |  |  |  |
|  |  |  |  |  |  |  |  |  |  |
|  |  |  |  |  |  |  |  |  |  |
|  |  |  |  |  |  |  |  |  |  |
|  |  |  |  |  |  |  |  |  |  |
|  |  |  |  |  |  |  |  |  |  |
|  |  |  |  |  |  |  |  |  |  |
|  |  |  |  |  |  |  |  |  |  |
|  |  |  |  |  |  |  |  |  |  |
|  |  |  |  |  |  |  |  |  |  |
|  |  |  |  |  |  |  |  |  |  |
|  |  |  |  |  |  |  |  |  |  |
|  |  |  |  |  |  |  |  |  |  |
|  |  |  |  |  |  |  |  |  |  |
|  |  |  |  |  |  |  |  |  |  |
|  |  |  |  |  |  |  |  |  |  |
|  |  |  |  |  |  |  |  |  |  |
|  |  |  |  |  |  |  |  |  |  |
|  |  |  |  |  |  |  |  |  |  |
|  |  |  |  |  |  |  |  |  |  |
|  |  |  |  |  |  |  |  |  |  |
|  |  |  |  |  |  |  |  |  |  |
|  |  |  |  |  |  |  |  |  |  |
|  |  |  |  |  |  |  |  |  |  |
|  |  |  |  |  |  |  |  |  |  |
|  |  |  |  |  |  |  |  |  |  |
|  |  |  |  |  |  |  |  |  |  |
|  |  |  |  |  |  |  |  |  |  |
|  |  |  |  |  |  |  |  |  |  |
|  |  |  |  |  |  |  |  |  |  |
|  |  |  |  |  |  |  |  |  |  |
|  |  |  |  |  |  |  |  |  |  |
|  |  |  |  |  |  |  |  |  |  |
|  |  |  |  |  |  |  |  |  |  |
|  |  |  |  |  |  |  |  |  |  |
|  |  |  |  |  |  |  |  |  |  |
|  |  |  |  |  |  |  |  |  |  |
|  |  |  |  |  |  |  |  |  |  |
|  |  |  |  |  |  |  |  |  |  |

Frequency Missing = 280

Table of ethnicity by RminusL

| ethnicity(Hispanic or Latino)             |       | RminusL |       |       |       |       |    |
|-------------------------------------------|-------|---------|-------|-------|-------|-------|----|
| Frequency                                 |       |         |       |       |       |       |    |
| Row Pct                                   |       |         |       |       |       |       |    |
| Col Pct                                   |       | -3      | -2    | -1    | 0     | 1     |    |
| 2                                         | 3     | Total   |       |       |       |       |    |
| -----+-----+-----+-----+-----+-----+----- |       |         |       |       |       |       |    |
| -+-----+                                  |       |         |       |       |       |       |    |
| No                                        |       | 18      | 13    | 22    | 64    | 40    | 21 |
|                                           | 42    | 220     |       |       |       |       |    |
|                                           |       | 8.18    | 5.91  | 10.00 | 29.09 | 18.18 |    |
| 9.55                                      | 19.09 |         |       |       |       |       |    |
|                                           |       | 94.74   | 92.86 | 81.48 | 91.43 | 88.89 |    |
| 100.00                                    | 91.30 |         |       |       |       |       |    |
| -----+-----+-----+-----+-----+-----+----- |       |         |       |       |       |       |    |
| -+-----+                                  |       |         |       |       |       |       |    |
| Yes                                       |       | 1       | 1     | 5     | 6     | 5     | 0  |
|                                           | 4     | 22      |       |       |       |       |    |
|                                           |       | 4.55    | 4.55  | 22.73 | 27.27 | 22.73 |    |
| 0.00                                      | 18.18 |         |       |       |       |       |    |
|                                           |       | 5.26    | 7.14  | 18.52 | 8.57  | 11.11 |    |
| 0.00                                      | 8.70  |         |       |       |       |       |    |
| -----+-----+-----+-----+-----+-----+----- |       |         |       |       |       |       |    |
| -+-----+                                  |       |         |       |       |       |       |    |
| Total                                     |       | 19      | 14    | 27    | 70    | 45    | 21 |
|                                           | 46    | 242     |       |       |       |       |    |

Frequency Missing = 281

Table of Married by RminusL

| Married   |   | RminusL |    |    |   |   |  |
|-----------|---|---------|----|----|---|---|--|
| Frequency |   |         |    |    |   |   |  |
| Row Pct   |   |         |    |    |   |   |  |
| Col Pct   |   | -3      | -2 | -1 | 0 | 1 |  |
| 2         | 3 | Total   |    |    |   |   |  |





|                                           |       |       |       |       |       |       |    |
|-------------------------------------------|-------|-------|-------|-------|-------|-------|----|
|                                           |       | 7.14  | 3.57  | 10.00 | 28.57 | 20.71 |    |
| 8.57                                      | 21.43 |       |       |       |       |       |    |
|                                           |       | 55.56 | 41.67 | 50.00 | 59.70 | 67.44 |    |
| 66.67                                     | 62.50 |       |       |       |       |       |    |
| -----+-----+-----+-----+-----+-----+----- |       |       |       |       |       |       |    |
| -+-----+                                  |       |       |       |       |       |       |    |
| Total                                     |       | 18    | 12    | 28    | 67    | 43    | 18 |
|                                           | 48    | 234   |       |       |       |       |    |

Frequency Missing = 289

Table of Employed by RminusL

Employed RminusL

|                                           |       |       |       |       |       |       |      |    |    |  |    |  |
|-------------------------------------------|-------|-------|-------|-------|-------|-------|------|----|----|--|----|--|
| Frequency                                 |       |       |       |       |       |       |      |    |    |  |    |  |
| Row Pct                                   |       |       |       |       |       |       |      |    |    |  |    |  |
| Col Pct                                   |       |       | -3    |       | -2    |       | -1   |    | 0  |  | 1  |  |
|                                           | 2     |       | 3     |       | Total |       |      |    |    |  |    |  |
| -----+-----+-----+-----+-----+-----+----- |       |       |       |       |       |       |      |    |    |  |    |  |
| -+-----+                                  |       |       |       |       |       |       |      |    |    |  |    |  |
|                                           | 0     | 3     | 6     | 13    | 24    | 14    | 4    | 15 |    |  |    |  |
|                                           | 79    |       |       |       |       |       |      |    |    |  |    |  |
|                                           |       | 3.80  | 7.59  | 16.46 | 30.38 | 17.72 | 5.06 |    |    |  |    |  |
|                                           | 18.99 |       |       |       |       |       |      |    |    |  |    |  |
|                                           |       | 15.00 | 54.55 | 48.15 | 35.29 | 33.33 |      |    |    |  |    |  |
|                                           | 25.00 | 33.33 |       |       |       |       |      |    |    |  |    |  |
| -----+-----+-----+-----+-----+-----+----- |       |       |       |       |       |       |      |    |    |  |    |  |
| -+-----+                                  |       |       |       |       |       |       |      |    |    |  |    |  |
|                                           | 1     | 17    | 5     | 14    | 44    | 28    | 12   | 30 |    |  |    |  |
|                                           | 150   |       |       |       |       |       |      |    |    |  |    |  |
|                                           |       | 11.33 | 3.33  | 9.33  | 29.33 | 18.67 |      |    |    |  |    |  |
|                                           | 8.00  | 20.00 |       |       |       |       |      |    |    |  |    |  |
|                                           |       | 85.00 | 45.45 | 51.85 | 64.71 | 66.67 |      |    |    |  |    |  |
|                                           | 75.00 | 66.67 |       |       |       |       |      |    |    |  |    |  |
| -----+-----+-----+-----+-----+-----+----- |       |       |       |       |       |       |      |    |    |  |    |  |
| -+-----+                                  |       |       |       |       |       |       |      |    |    |  |    |  |
| Total                                     | 20    |       | 11    |       | 27    |       | 68   |    | 42 |  | 16 |  |
|                                           | 45    | 229   |       |       |       |       |      |    |    |  |    |  |

Frequency Missing = 294

# Table of aura by RminusL

aura(Is aura present?) RminusL

|                                           |       |       |       |       |       |       |    |
|-------------------------------------------|-------|-------|-------|-------|-------|-------|----|
| Frequency                                 |       |       |       |       |       |       |    |
| Row                                       | Pct   |       |       |       |       |       |    |
| Col                                       | Pct   | -3    | -2    | -1    | 0     | 1     |    |
|                                           | 2     | 3     | Total |       |       |       |    |
| -----+-----+-----+-----+-----+-----+----- |       |       |       |       |       |       |    |
| -+-----+                                  |       |       |       |       |       |       |    |
| No                                        |       | 11    | 8     | 17    | 32    | 21    | 8  |
| 23                                        | 120   |       |       |       |       |       |    |
|                                           |       | 9.17  | 6.67  | 14.17 | 26.67 | 17.50 |    |
| 6.67                                      | 19.17 |       |       |       |       |       |    |
|                                           |       | 61.11 | 80.00 | 77.27 | 72.73 | 75.00 |    |
| 53.33                                     | 67.65 |       |       |       |       |       |    |
| -----+-----+-----+-----+-----+-----+----- |       |       |       |       |       |       |    |
| -+-----+                                  |       |       |       |       |       |       |    |
| Yes                                       |       | 7     | 2     | 5     | 12    | 7     | 7  |
|                                           | 11    | 51    |       |       |       |       |    |
|                                           |       | 13.73 | 3.92  | 9.80  | 23.53 | 13.73 |    |
| 13.73                                     | 21.57 |       |       |       |       |       |    |
|                                           |       | 38.89 | 20.00 | 22.73 | 27.27 | 25.00 |    |
| 46.67                                     | 32.35 |       |       |       |       |       |    |
| -----+-----+-----+-----+-----+-----+----- |       |       |       |       |       |       |    |
| -+-----+                                  |       |       |       |       |       |       |    |
| Total                                     |       | 18    | 10    | 22    | 44    | 28    | 15 |
|                                           | 34    | 171   |       |       |       |       |    |

Frequency Missing = 352

# Table of lateralized\_headaches by RminusL

lateralized\_headaches(Are headaches lateralized?) RminusL

|                                           |   |       |    |    |   |   |   |
|-------------------------------------------|---|-------|----|----|---|---|---|
| Frequency                                 |   |       |    |    |   |   |   |
| Row Pct                                   |   |       |    |    |   |   |   |
| Col Pct                                   |   | -3    | -2 | -1 | 0 | 1 |   |
| 2                                         | 3 | Total |    |    |   |   |   |
| -----+-----+-----+-----+-----+-----+----- |   |       |    |    |   |   |   |
| -+-----+                                  |   |       |    |    |   |   |   |
| No                                        |   | 0     | 0  | 0  | 0 | 0 | 0 |
|                                           | 0 | 0     |    |    |   |   |   |

|                                           |        |        |        |        |        |      |   |
|-------------------------------------------|--------|--------|--------|--------|--------|------|---|
|                                           | .      | .      | .      | .      | .      | .    | . |
| 0.00                                      | 0.00   | 0.00   | 0.00   | 0.00   | 0.00   | 0.00 |   |
| -----+-----+-----+-----+-----+-----+----- |        |        |        |        |        |      |   |
| -+-----+                                  |        |        |        |        |        |      |   |
| Yes                                       | 24     | 15     | 26     | 56     | 41     | 19   |   |
| 48                                        | 229    |        |        |        |        |      |   |
|                                           | 10.48  | 6.55   | 11.35  | 24.45  | 17.90  |      |   |
| 8.30                                      | 20.96  |        |        |        |        |      |   |
|                                           | 100.00 | 100.00 | 100.00 | 100.00 | 100.00 |      |   |
| 100.00                                    | 100.00 |        |        |        |        |      |   |
| -----+-----+-----+-----+-----+-----+----- |        |        |        |        |        |      |   |
| -+-----+                                  |        |        |        |        |        |      |   |
| Total                                     | 24     | 15     | 26     | 56     | 41     | 19   |   |
| 48                                        | 229    |        |        |        |        |      |   |

Frequency Missing = 294

Table of MigraineDx by RminusL

| MigraineDx                          | RminusL |        |        |        |        |    |
|-------------------------------------|---------|--------|--------|--------|--------|----|
| Frequency                           |         |        |        |        |        |    |
| Row Pct                             |         |        |        |        |        |    |
| Col Pct                             | -3      | -2     | -1     | 0      | 1      |    |
| 2                                   | 3       | Total  |        |        |        |    |
| -----+-----+-----+-----+-----+----- |         |        |        |        |        |    |
| -+-----+                            |         |        |        |        |        |    |
| 1                                   | 24      | 17     | 33     | 80     | 47     | 22 |
| 50                                  | 273     |        |        |        |        |    |
|                                     | 8.79    | 6.23   | 12.09  | 29.30  | 17.22  |    |
| 8.06                                | 18.32   |        |        |        |        |    |
|                                     | 100.00  | 100.00 | 100.00 | 100.00 | 100.00 |    |
| 100.00                              | 100.00  |        |        |        |        |    |
| -----+-----+-----+-----+-----+----- |         |        |        |        |        |    |
| -+-----+                            |         |        |        |        |        |    |
| Total                               | 24      | 17     | 33     | 80     | 47     | 22 |
| 50                                  | 273     |        |        |        |        |    |

Frequency Missing = 250

Table of RightHanded by RminusL

RightHanded      RminusL

| Frequency                                 |       |       |       |        |       |       |  |
|-------------------------------------------|-------|-------|-------|--------|-------|-------|--|
| Row Pct                                   |       |       |       |        |       |       |  |
| Col Pct                                   |       | -3    | -2    | -1     | 0     | 1     |  |
| 2                                         | 3     | Total |       |        |       |       |  |
| -----+-----+-----+-----+-----+-----+----- |       |       |       |        |       |       |  |
| -+-----+                                  |       |       |       |        |       |       |  |
| 0                                         | 7     | 2     | 0     | 10     | 2     | 0     |  |
| 5                                         | 26    |       |       |        |       |       |  |
|                                           |       | 26.92 | 7.69  | 0.00   | 38.46 | 7.69  |  |
| 0.00                                      | 19.23 |       |       |        |       |       |  |
|                                           |       | 30.43 | 13.33 | 0.00   | 13.33 | 4.88  |  |
| 0.00                                      | 10.87 |       |       |        |       |       |  |
| -----+-----+-----+-----+-----+-----+----- |       |       |       |        |       |       |  |
| -+-----+                                  |       |       |       |        |       |       |  |
| 1                                         | 16    | 13    | 27    | 65     | 39    | 20    |  |
| 41                                        | 221   |       |       |        |       |       |  |
|                                           |       | 7.24  | 5.88  | 12.22  | 29.41 | 17.65 |  |
| 9.05                                      | 18.55 |       |       |        |       |       |  |
|                                           |       | 69.57 | 86.67 | 100.00 | 86.67 | 95.12 |  |
| 100.00                                    | 89.13 |       |       |        |       |       |  |
| -----+-----+-----+-----+-----+-----+----- |       |       |       |        |       |       |  |
| -+-----+                                  |       |       |       |        |       |       |  |
| Total                                     | 23    | 15    | 27    | 75     | 41    | 20    |  |
| 46                                        | 247   |       |       |        |       |       |  |

Frequency Missing = 276

Table of Substance by RminusL

Substance      RminusL

| Frequency                                 |     |       |    |    |    |    |  |
|-------------------------------------------|-----|-------|----|----|----|----|--|
| Row Pct                                   |     |       |    |    |    |    |  |
| Col Pct                                   |     | -3    | -2 | -1 | 0  | 1  |  |
| 2                                         | 3   | Total |    |    |    |    |  |
| -----+-----+-----+-----+-----+-----+----- |     |       |    |    |    |    |  |
| -+-----+                                  |     |       |    |    |    |    |  |
| 0                                         | 24  | 16    | 32 | 78 | 47 | 20 |  |
| 50                                        | 267 |       |    |    |    |    |  |

|                                           |        |        |       |       |       |        |      |
|-------------------------------------------|--------|--------|-------|-------|-------|--------|------|
|                                           |        | 8.99   | 5.99  | 11.99 | 29.21 | 17.60  |      |
| 7.49                                      | 18.73  |        |       |       |       |        |      |
|                                           |        | 100.00 | 94.12 | 96.97 | 97.50 | 100.00 |      |
| 90.91                                     | 100.00 |        |       |       |       |        |      |
| -----+-----+-----+-----+-----+-----+----- |        |        |       |       |       |        |      |
| -+-----+                                  |        |        |       |       |       |        |      |
|                                           | 1      | 0      | 1     | 1     | 2     | 0      | 2    |
| 0                                         | 6      |        |       |       |       |        |      |
|                                           |        | 0.00   | 16.67 | 16.67 | 33.33 | 0.00   |      |
| 33.33                                     | 0.00   |        |       |       |       |        |      |
|                                           |        | 0.00   | 5.88  | 3.03  | 2.50  | 0.00   | 9.09 |
|                                           | 0.00   |        |       |       |       |        |      |
| -----+-----+-----+-----+-----+-----+----- |        |        |       |       |       |        |      |
| -+-----+                                  |        |        |       |       |       |        |      |
| Total                                     |        | 24     | 17    | 33    | 80    | 47     | 22   |
|                                           | 50     | 273    |       |       |       |        |      |

Frequency Missing = 250

Table of Anxiety by RminusL

Anxiety RminusL

|                                           |       |       |       |       |       |       |    |
|-------------------------------------------|-------|-------|-------|-------|-------|-------|----|
| Frequency                                 |       |       |       |       |       |       |    |
| Row Pct                                   |       |       |       |       |       |       |    |
| Col Pct                                   |       | -3    | -2    | -1    | 0     | 1     |    |
|                                           | 2     | 3     | Total |       |       |       |    |
| -----+-----+-----+-----+-----+-----+----- |       |       |       |       |       |       |    |
| -+-----+                                  |       |       |       |       |       |       |    |
|                                           | 0     | 15    | 11    | 20    | 57    | 32    | 15 |
|                                           | 186   |       |       |       |       |       | 36 |
|                                           |       | 8.06  | 5.91  | 10.75 | 30.65 | 17.20 |    |
| 8.06                                      | 19.35 |       |       |       |       |       |    |
|                                           |       | 62.50 | 64.71 | 60.61 | 71.25 | 68.09 |    |
| 68.18                                     | 72.00 |       |       |       |       |       |    |
| -----+-----+-----+-----+-----+-----+----- |       |       |       |       |       |       |    |
| -+-----+                                  |       |       |       |       |       |       |    |
|                                           | 1     | 9     | 6     | 13    | 23    | 15    | 7  |
|                                           | 87    |       |       |       |       |       | 14 |
|                                           |       | 10.34 | 6.90  | 14.94 | 26.44 | 17.24 |    |
| 8.05                                      | 16.09 |       |       |       |       |       |    |
|                                           |       | 37.50 | 35.29 | 39.39 | 28.75 | 31.91 |    |
| 31.82                                     | 28.00 |       |       |       |       |       |    |

|       |     |    |    |    |    |    |  |
|-------|-----|----|----|----|----|----|--|
|       |     |    |    |    |    |    |  |
| Total | 24  | 17 | 33 | 80 | 47 | 22 |  |
| 50    | 273 |    |    |    |    |    |  |

Frequency Missing = 250

Table of Depression by RminusL

| Depression | RminusL |       |       |       |       |    |    |
|------------|---------|-------|-------|-------|-------|----|----|
| Frequency  |         |       |       |       |       |    |    |
| Row Pct    |         |       |       |       |       |    |    |
| Col Pct    | -3      | -2    | -1    | 0     | 1     |    |    |
| 2          | 3       | Total |       |       |       |    |    |
|            |         |       |       |       |       |    |    |
| 0          | 19      | 10    | 19    | 53    | 32    | 11 |    |
| 39         | 183     |       |       |       |       |    |    |
|            | 10.38   | 5.46  | 10.38 | 28.96 | 17.49 |    |    |
| 6.01       | 21.31   |       |       |       |       |    |    |
|            | 79.17   | 58.82 | 57.58 | 66.25 | 68.09 |    |    |
| 50.00      | 78.00   |       |       |       |       |    |    |
|            |         |       |       |       |       |    |    |
| 1          | 5       | 7     | 14    | 27    | 15    | 11 | 11 |
|            | 90      |       |       |       |       |    |    |
|            | 5.56    | 7.78  | 15.56 | 30.00 | 16.67 |    |    |
| 12.22      | 12.22   |       |       |       |       |    |    |
|            | 20.83   | 41.18 | 42.42 | 33.75 | 31.91 |    |    |
| 50.00      | 22.00   |       |       |       |       |    |    |
|            |         |       |       |       |       |    |    |
| Total      | 24      | 17    | 33    | 80    | 47    | 22 |    |
| 50         | 273     |       |       |       |       |    |    |

Frequency Missing = 250

Table of Bipolar by RminusL

Bipolar RminusL

| Frequency                                                   |  |  |  |  |  |  |  |  |  |
|-------------------------------------------------------------|--|--|--|--|--|--|--|--|--|
| Row Pct                                                     |  |  |  |  |  |  |  |  |  |
| Col Pct                                                     |  |  |  |  |  |  |  |  |  |
| 2  3  Total                                                 |  |  |  |  |  |  |  |  |  |
| -----+-----+-----+-----+-----+-----+-----+-----+-----+----- |  |  |  |  |  |  |  |  |  |
| -+-----+-----                                               |  |  |  |  |  |  |  |  |  |
| 0   23   15   32   76   46   20                             |  |  |  |  |  |  |  |  |  |
| 48   260                                                    |  |  |  |  |  |  |  |  |  |
| 8.85   5.77   12.31   29.23   17.69                         |  |  |  |  |  |  |  |  |  |
| 7.69   18.46                                                |  |  |  |  |  |  |  |  |  |
| 95.83   88.24   96.97   95.00   97.87                       |  |  |  |  |  |  |  |  |  |
| 90.91   96.00                                               |  |  |  |  |  |  |  |  |  |
| -----+-----+-----+-----+-----+-----+-----+-----+-----+----- |  |  |  |  |  |  |  |  |  |
| -+-----+-----                                               |  |  |  |  |  |  |  |  |  |
| 1   1   2   1   4   1   2                                   |  |  |  |  |  |  |  |  |  |
| 2   13                                                      |  |  |  |  |  |  |  |  |  |
| 7.69   15.38   7.69   30.77   7.69                          |  |  |  |  |  |  |  |  |  |
| 15.38   15.38                                               |  |  |  |  |  |  |  |  |  |
| 4.17   11.76   3.03   5.00   2.13                           |  |  |  |  |  |  |  |  |  |
| 9.09   4.00                                                 |  |  |  |  |  |  |  |  |  |
| -----+-----+-----+-----+-----+-----+-----+-----+-----+----- |  |  |  |  |  |  |  |  |  |
| -+-----+-----                                               |  |  |  |  |  |  |  |  |  |
| Total 24 17 33 80 47 22                                     |  |  |  |  |  |  |  |  |  |
| 50 273                                                      |  |  |  |  |  |  |  |  |  |

Frequency Missing = 250

Table of Cognitive by RminusL

| Cognitive                                                   |  |  |  |  |  |  |  |  |  |
|-------------------------------------------------------------|--|--|--|--|--|--|--|--|--|
| RminusL                                                     |  |  |  |  |  |  |  |  |  |
| Frequency                                                   |  |  |  |  |  |  |  |  |  |
| Row Pct                                                     |  |  |  |  |  |  |  |  |  |
| Col Pct                                                     |  |  |  |  |  |  |  |  |  |
| 2  3  Total                                                 |  |  |  |  |  |  |  |  |  |
| -----+-----+-----+-----+-----+-----+-----+-----+-----+----- |  |  |  |  |  |  |  |  |  |
| -+-----+-----                                               |  |  |  |  |  |  |  |  |  |
| 0   24   17   33   80   47   22   50                        |  |  |  |  |  |  |  |  |  |
| 273                                                         |  |  |  |  |  |  |  |  |  |
| 8.79   6.23   12.09   29.30   17.22                         |  |  |  |  |  |  |  |  |  |
| 8.06   18.32                                                |  |  |  |  |  |  |  |  |  |
| 100.00   100.00   100.00   100.00   100.00                  |  |  |  |  |  |  |  |  |  |
| 100.00   100.00                                             |  |  |  |  |  |  |  |  |  |



|       |      |      |      |      |      |      |      |   |   |
|-------|------|------|------|------|------|------|------|---|---|
|       |      |      |      |      |      |      |      |   |   |
|       |      |      |      |      |      |      |      |   |   |
| 1     | 0    | 0    | 0    | 0    | 0    | 0    | 0    |   |   |
| 0     | 0    | .    | .    | .    | .    | .    | .    | . | . |
|       | .    |      |      |      |      |      |      |   |   |
|       |      | 0.00 | 0.00 | 0.00 | 0.00 | 0.00 | 0.00 |   |   |
| 0.00  | 0.00 |      |      |      |      |      |      |   |   |
|       |      |      |      |      |      |      |      |   |   |
|       |      |      |      |      |      |      |      |   |   |
| Total | 24   | 17   | 33   | 80   | 47   | 22   |      |   |   |
| 50    | 273  |      |      |      |      |      |      |   |   |

Frequency Missing = 250

Table of Eating by RminusL

Eating RminusL

| Frequency                                 |        |        |        |        |        |        |
|-------------------------------------------|--------|--------|--------|--------|--------|--------|
| Row                                       | Pct    |        |        |        |        |        |
| Col                                       | Pct    | -3     | -2     | -1     | 0      | 1      |
|                                           | 2      | 3      | Total  |        |        |        |
| -----+-----+-----+-----+-----+-----+----- |        |        |        |        |        |        |
| -+-----+-----                             |        |        |        |        |        |        |
|                                           | 0      | 24     | 17     | 33     | 76     | 47     |
| 50                                        | 269    |        |        |        |        | 22     |
|                                           |        | 8.92   | 6.32   | 12.27  | 28.25  | 17.47  |
| 8.18                                      | 18.59  |        |        |        |        |        |
|                                           |        | 100.00 | 100.00 | 100.00 | 95.00  | 100.00 |
| 100.00                                    | 100.00 |        |        |        |        |        |
| -----+-----+-----+-----+-----+-----+----- |        |        |        |        |        |        |
| -+-----+-----                             |        |        |        |        |        |        |
|                                           | 1      | 0      | 0      | 0      | 4      | 0      |
| 0                                         | 4      |        |        |        |        | 0      |
|                                           |        | 0.00   | 0.00   | 0.00   | 100.00 | 0.00   |
| 0.00                                      | 0.00   |        |        |        |        |        |
|                                           |        | 0.00   | 0.00   | 0.00   | 5.00   | 0.00   |
| 0.00                                      | 0.00   |        |        |        |        |        |
| -----+-----+-----+-----+-----+-----+----- |        |        |        |        |        |        |
| -+-----+-----                             |        |        |        |        |        |        |
| Total                                     |        | 24     | 17     | 33     | 80     | 47     |
|                                           |        |        |        |        |        | 22     |
| 50                                        | 273    |        |        |        |        |        |

Frequency Missing = 250

Table of Psychotic by RminusL

| Psychotic                                 |        | RminusL |        |        |        |        |  |
|-------------------------------------------|--------|---------|--------|--------|--------|--------|--|
| Frequency                                 |        |         |        |        |        |        |  |
| Row Pct                                   |        |         |        |        |        |        |  |
| Col Pct                                   |        | -3      | -2     | -1     | 0      | 1      |  |
| 2                                         | 3      | Total   |        |        |        |        |  |
| -----+-----+-----+-----+-----+-----+----- |        |         |        |        |        |        |  |
| -+-----+                                  |        |         |        |        |        |        |  |
| 0                                         | 24     | 17      | 33     | 80     | 47     | 21     |  |
| 49                                        | 271    |         |        |        |        |        |  |
|                                           | 8.86   | 6.27    | 12.18  | 29.52  | 17.34  |        |  |
| 7.75                                      | 18.08  |         |        |        |        |        |  |
|                                           | 100.00 | 100.00  | 100.00 | 100.00 | 100.00 | 100.00 |  |
| 95.45                                     | 98.00  |         |        |        |        |        |  |
| -----+-----+-----+-----+-----+-----+----- |        |         |        |        |        |        |  |
| -+-----+                                  |        |         |        |        |        |        |  |
| 1                                         | 0      | 0       | 0      | 0      | 0      | 1      |  |
| 1                                         | 2      |         |        |        |        |        |  |
|                                           | 0.00   | 0.00    | 0.00   | 0.00   | 0.00   | 0.00   |  |
| 50.00                                     | 50.00  |         |        |        |        |        |  |
|                                           | 0.00   | 0.00    | 0.00   | 0.00   | 0.00   | 0.00   |  |
| 4.55                                      | 2.00   |         |        |        |        |        |  |
| -----+-----+-----+-----+-----+-----+----- |        |         |        |        |        |        |  |
| -+-----+                                  |        |         |        |        |        |        |  |
| Total                                     | 24     | 17      | 33     | 80     | 47     | 22     |  |
| 50                                        | 273    |         |        |        |        |        |  |

Frequency Missing = 250

Table of PTSD by RminusL

| PTSD      |   | RminusL |    |    |   |   |  |
|-----------|---|---------|----|----|---|---|--|
| Frequency |   |         |    |    |   |   |  |
| Row Pct   |   |         |    |    |   |   |  |
| Col Pct   |   | -3      | -2 | -1 | 0 | 1 |  |
| 2         | 3 | Total   |    |    |   |   |  |



|                                           |       |       |       |       |       |       |    |
|-------------------------------------------|-------|-------|-------|-------|-------|-------|----|
|                                           |       | 14.29 | 7.14  | 17.86 | 19.64 | 14.29 |    |
| 7.14                                      | 19.64 |       |       |       |       |       |    |
|                                           |       | 33.33 | 23.53 | 30.30 | 13.75 | 17.02 |    |
| 18.18                                     | 22.00 |       |       |       |       |       |    |
| -----+-----+-----+-----+-----+-----+----- |       |       |       |       |       |       |    |
| -+-----+                                  |       |       |       |       |       |       |    |
| Total                                     |       | 24    | 17    | 33    | 80    | 47    | 22 |
|                                           | 50    | 273   |       |       |       |       |    |

Frequency Missing = 250

Table of BarbituratesPrior by RminusL

BarbituratesPrior RminusL

|                                           |       |       |       |       |       |    |    |
|-------------------------------------------|-------|-------|-------|-------|-------|----|----|
| Frequency                                 |       |       |       |       |       |    |    |
| Row Pct                                   |       |       |       |       |       |    |    |
| Col Pct                                   |       | -3    | -2    | -1    | 0     | 1  | 2  |
| 3  Total                                  |       |       |       |       |       |    |    |
| -----+-----+-----+-----+-----+-----+----- |       |       |       |       |       |    |    |
| -+-----+                                  |       |       |       |       |       |    |    |
| 0                                         | 13    | 15    | 23    | 64    | 33    | 15 |    |
| 40   203                                  |       |       |       |       |       |    |    |
|                                           | 6.40  | 7.39  | 11.33 | 31.53 | 16.26 |    |    |
| 7.39   19.70                              |       |       |       |       |       |    |    |
|                                           | 54.17 | 88.24 | 69.70 | 80.00 | 70.21 |    |    |
| 68.18   80.00                             |       |       |       |       |       |    |    |
| -----+-----+-----+-----+-----+-----+----- |       |       |       |       |       |    |    |
| -+-----+                                  |       |       |       |       |       |    |    |
| 1                                         | 11    | 2     | 10    | 16    | 14    | 7  | 10 |
| 70                                        |       |       |       |       |       |    |    |
|                                           | 15.71 | 2.86  | 14.29 | 22.86 | 20.00 |    |    |
| 10.00   14.29                             |       |       |       |       |       |    |    |
|                                           | 45.83 | 11.76 | 30.30 | 20.00 | 29.79 |    |    |
| 31.82   20.00                             |       |       |       |       |       |    |    |
| -----+-----+-----+-----+-----+-----+----- |       |       |       |       |       |    |    |
| -+-----+                                  |       |       |       |       |       |    |    |
| Total                                     | 24    | 17    | 33    | 80    | 47    | 22 |    |
| 50 273                                    |       |       |       |       |       |    |    |

Frequency Missing = 250

Table of TriptansPrior by RminusL

TriptansPrior RminusL

| Frequency                                 |       |       |       |       |       |    |    |
|-------------------------------------------|-------|-------|-------|-------|-------|----|----|
| Row Pct                                   |       |       |       |       |       |    |    |
| Col Pct                                   | -3    | -2    | -1    | 0     | 1     |    |    |
| 2                                         | 3     | Total |       |       |       |    |    |
| -----+-----+-----+-----+-----+-----+----- |       |       |       |       |       |    |    |
| -+-----+                                  |       |       |       |       |       |    |    |
| 0                                         | 9     | 11    | 19    | 50    | 22    | 11 |    |
| 22                                        | 144   |       |       |       |       |    |    |
|                                           | 6.25  | 7.64  | 13.19 | 34.72 | 15.28 |    |    |
| 7.64                                      | 15.28 |       |       |       |       |    |    |
|                                           | 37.50 | 64.71 | 57.58 | 62.50 | 46.81 |    |    |
| 50.00                                     | 44.00 |       |       |       |       |    |    |
| -----+-----+-----+-----+-----+-----+----- |       |       |       |       |       |    |    |
| -+-----+                                  |       |       |       |       |       |    |    |
| 1                                         | 15    | 6     | 14    | 30    | 25    | 11 | 28 |
|                                           | 129   |       |       |       |       |    |    |
|                                           | 11.63 | 4.65  | 10.85 | 23.26 | 19.38 |    |    |
| 8.53                                      | 21.71 |       |       |       |       |    |    |
|                                           | 62.50 | 35.29 | 42.42 | 37.50 | 53.19 |    |    |
| 50.00                                     | 56.00 |       |       |       |       |    |    |
| -----+-----+-----+-----+-----+-----+----- |       |       |       |       |       |    |    |
| -+-----+                                  |       |       |       |       |       |    |    |
| Total                                     | 24    | 17    | 33    | 80    | 47    | 22 |    |
| 50                                        | 273   |       |       |       |       |    |    |

Frequency Missing = 250

Table of OpioidsPost by RminusL

OpioidsPost RminusL

| Frequency                                 |     |       |    |    |    |    |  |
|-------------------------------------------|-----|-------|----|----|----|----|--|
| Row Pct                                   |     |       |    |    |    |    |  |
| Col Pct                                   | -3  | -2    | -1 | 0  | 1  |    |  |
| 2                                         | 3   | Total |    |    |    |    |  |
| -----+-----+-----+-----+-----+-----+----- |     |       |    |    |    |    |  |
| -+-----+                                  |     |       |    |    |    |    |  |
| 0                                         | 20  | 14    | 23 | 66 | 39 | 17 |  |
| 43                                        | 222 |       |    |    |    |    |  |

|                                           |       |       |       |       |       |       |    |
|-------------------------------------------|-------|-------|-------|-------|-------|-------|----|
|                                           |       | 9.01  | 6.31  | 10.36 | 29.73 | 17.57 |    |
| 7.66                                      | 19.37 |       |       |       |       |       |    |
|                                           |       | 83.33 | 82.35 | 69.70 | 82.50 | 82.98 |    |
| 77.27                                     | 86.00 |       |       |       |       |       |    |
| -----+-----+-----+-----+-----+-----+----- |       |       |       |       |       |       |    |
| -+-----+                                  |       |       |       |       |       |       |    |
|                                           | 1     | 4     | 3     | 10    | 14    | 8     | 5  |
| 7                                         | 51    |       |       |       |       |       |    |
|                                           |       | 7.84  | 5.88  | 19.61 | 27.45 | 15.69 |    |
| 9.80                                      | 13.73 |       |       |       |       |       |    |
|                                           |       | 16.67 | 17.65 | 30.30 | 17.50 | 17.02 |    |
| 22.73                                     | 14.00 |       |       |       |       |       |    |
| -----+-----+-----+-----+-----+-----+----- |       |       |       |       |       |       |    |
| -+-----+                                  |       |       |       |       |       |       |    |
| Total                                     |       | 24    | 17    | 33    | 80    | 47    | 22 |
|                                           | 50    | 273   |       |       |       |       |    |

Frequency Missing = 250

Table of BarbituratesPost by RminusL

| BarbituratesPost                          |       | RminusL |       |       |       |       |    |
|-------------------------------------------|-------|---------|-------|-------|-------|-------|----|
| Frequency                                 |       |         |       |       |       |       |    |
| Row Pct                                   |       |         |       |       |       |       |    |
| Col Pct                                   |       | -3      | -2    | -1    | 0     | 1     |    |
|                                           | 2     | 3       | Total |       |       |       |    |
| -----+-----+-----+-----+-----+-----+----- |       |         |       |       |       |       |    |
| -+-----+                                  |       |         |       |       |       |       |    |
|                                           | 0     | 19      | 15    | 24    | 64    | 33    | 14 |
| 36                                        | 205   |         |       |       |       |       |    |
|                                           |       | 9.27    | 7.32  | 11.71 | 31.22 | 16.10 |    |
| 6.83                                      | 17.56 |         |       |       |       |       |    |
|                                           |       | 79.17   | 88.24 | 72.73 | 80.00 | 70.21 |    |
| 63.64                                     | 72.00 |         |       |       |       |       |    |
| -----+-----+-----+-----+-----+-----+----- |       |         |       |       |       |       |    |
| -+-----+                                  |       |         |       |       |       |       |    |
|                                           | 1     | 5       | 2     | 9     | 16    | 14    | 8  |
| 14                                        | 68    |         |       |       |       |       |    |
|                                           |       | 7.35    | 2.94  | 13.24 | 23.53 | 20.59 |    |
| 11.76                                     | 20.59 |         |       |       |       |       |    |
|                                           |       | 20.83   | 11.76 | 27.27 | 20.00 | 29.79 |    |
| 36.36                                     | 28.00 |         |       |       |       |       |    |

|       |     |    |    |    |    |    |  |
|-------|-----|----|----|----|----|----|--|
|       |     |    |    |    |    |    |  |
| Total | 24  | 17 | 33 | 80 | 47 | 22 |  |
| 50    | 273 |    |    |    |    |    |  |

Frequency Missing = 250

Table of TriptansPost by RminusL

TriptansPost RminusL

|           |       |       |       |       |       |    |    |
|-----------|-------|-------|-------|-------|-------|----|----|
| Frequency |       |       |       |       |       |    |    |
| Row Pct   |       |       |       |       |       |    |    |
| Col Pct   |       | -3    | -2    | -1    | 0     | 1  |    |
| 2         | 3     | Total |       |       |       |    |    |
| 0         | 4     | 5     | 13    | 23    | 14    | 9  | 10 |
| 78        |       |       |       |       |       |    |    |
|           | 5.13  | 6.41  | 16.67 | 29.49 | 17.95 |    |    |
| 11.54     | 12.82 |       |       |       |       |    |    |
|           | 16.67 | 29.41 | 39.39 | 28.75 | 29.79 |    |    |
| 40.91     | 20.00 |       |       |       |       |    |    |
| 1         | 20    | 12    | 20    | 57    | 33    | 13 |    |
| 40        | 195   |       |       |       |       |    |    |
|           | 10.26 | 6.15  | 10.26 | 29.23 | 16.92 |    |    |
| 6.67      | 20.51 |       |       |       |       |    |    |
|           | 83.33 | 70.59 | 60.61 | 71.25 | 70.21 |    |    |
| 59.09     | 80.00 |       |       |       |       |    |    |
| Total     | 24    | 17    | 33    | 80    | 47    | 22 |    |
| 50        | 273   |       |       |       |       |    |    |

Frequency Missing = 250

Table of race by RminusL

race(Race) RminusL

|                                     |       |       |        |       |       |       |    |
|-------------------------------------|-------|-------|--------|-------|-------|-------|----|
| Frequency                           |       |       |        |       |       |       |    |
| Row Pct                             |       |       |        |       |       |       |    |
| Col Pct                             |       | -3    | -2     | -1    | 0     | 1     |    |
|                                     | 2     | 3     | Total  |       |       |       |    |
| -----+-----+-----+-----+-----+----- |       |       |        |       |       |       |    |
| +-----+-----+                       |       |       |        |       |       |       |    |
| American Indian                     |       | 0     | 1      | 0     | 0     | 0     |    |
|                                     | 0     | 0     | 1      |       |       |       |    |
| or Alaska Native                    |       | 0.00  | 100.00 | 0.00  | 0.00  | 0.00  |    |
|                                     | 0.00  | 0.00  |        |       |       |       |    |
|                                     |       | 0.00  | 7.14   | 0.00  | 0.00  | 0.00  |    |
| 0.00                                | 0.00  |       |        |       |       |       |    |
| -----+-----+-----+-----+-----+----- |       |       |        |       |       |       |    |
| +-----+-----+                       |       |       |        |       |       |       |    |
| Asian                               |       | 0     | 0      | 1     | 2     | 0     | 0  |
|                                     | 0     | 3     |        |       |       |       |    |
|                                     |       | 0.00  | 0.00   | 33.33 | 66.67 | 0.00  |    |
| 0.00                                | 0.00  |       |        |       |       |       |    |
|                                     |       | 0.00  | 0.00   | 3.70  | 2.86  | 0.00  |    |
| 0.00                                | 0.00  |       |        |       |       |       |    |
| -----+-----+-----+-----+-----+----- |       |       |        |       |       |       |    |
| +-----+-----+                       |       |       |        |       |       |       |    |
| Black or African                    |       | 1     | 2      | 0     | 2     | 2     |    |
|                                     | 1     | 2     | 10     |       |       |       |    |
| /American                           |       | 10.00 | 20.00  | 0.00  | 20.00 | 20.00 |    |
| 10.00                               | 20.00 |       |        |       |       |       |    |
|                                     |       | 5.00  | 14.29  | 0.00  | 2.86  | 4.44  |    |
| 4.76                                | 4.35  |       |        |       |       |       |    |
| -----+-----+-----+-----+-----+----- |       |       |        |       |       |       |    |
| +-----+-----+                       |       |       |        |       |       |       |    |
| White                               |       | 19    | 11     | 26    | 66    | 43    | 20 |
|                                     | 44    | 229   |        |       |       |       |    |
|                                     |       | 8.30  | 4.80   | 11.35 | 28.82 | 18.78 |    |
| 8.73                                | 19.21 |       |        |       |       |       |    |
|                                     |       | 95.00 | 78.57  | 96.30 | 94.29 | 95.56 |    |
| 95.24                               | 95.65 |       |        |       |       |       |    |
| -----+-----+-----+-----+-----+----- |       |       |        |       |       |       |    |
| +-----+-----+                       |       |       |        |       |       |       |    |
| Other                               |       | 0     | 0      | 0     | 0     | 0     | 0  |
|                                     | 0     | 0     |        |       |       |       |    |
|                                     |       | .     | .      | .     | .     | .     | .  |
|                                     | .     |       |        |       |       |       |    |
|                                     |       | 0.00  | 0.00   | 0.00  | 0.00  | 0.00  |    |
| 0.00                                | 0.00  |       |        |       |       |       |    |



```

-----+-----+-----+-----+-----+-----
+-----+-----+
Total      20      14      27      70      45
21      46      243

```

Frequency Missing = 280

Table of marital\_status by RminusL

marital\_status(Marital Status)      RminusL

```

Frequency|
Row Pct  |
Col Pct  |      -3|      -2|      -1|      0|      1|
      2|      3|  Total
-----+-----+-----+-----+-----+-----
-+-----+
Married  |      17|      10|      19|      46|      29|      13
|      31|      165
|      10.30|      6.06|      11.52|      27.88|      17.58|
7.88|      18.79|
|      70.83|      62.50|      63.33|      58.23|      61.70|
61.90|      63.27|
-----+-----+-----+-----+-----+-----
-+-----+
Single   |      5|      4|      6|      30|      16|      7
|      11|      79
|      6.33|      5.06|      7.59|      37.97|      20.25|
8.86|      13.92|
|      20.83|      25.00|      20.00|      37.97|      34.04|
33.33|      22.45|
-----+-----+-----+-----+-----+-----
-+-----+
Divorced |      2|      1|      5|      3|      2|      1|
      7|      21
|      9.52|      4.76|      23.81|      14.29|      9.52|
4.76|      33.33|
|      8.33|      6.25|      16.67|      3.80|      4.26|
4.76|      14.29|
-----+-----+-----+-----+-----+-----
-+-----+
Widowed  |      0|      0|      0|      0|      0|      0
|      0|      0

```

|                                                             |      |        |      |      |      |      |      |      |      |
|-------------------------------------------------------------|------|--------|------|------|------|------|------|------|------|
|                                                             | .    |        | .    |      | .    |      | .    |      | .    |
| 0.00                                                        | 0.00 | 0.00   | 0.00 | 0.00 | 0.00 | 0.00 | 0.00 | 0.00 | 0.00 |
| -----+-----+-----+-----+-----+-----+-----+-----+-----+----- |      |        |      |      |      |      |      |      |      |
| Other                                                       | 0    | 1      | 0    | 0    | 0    | 0    | 0    | 0    | 0    |
| 0                                                           | 1    |        |      |      |      |      |      |      |      |
| 0.00                                                        | 0.00 | 100.00 | 0.00 | 0.00 | 0.00 | 0.00 | 0.00 | 0.00 | 0.00 |
| 0.00                                                        | 0.00 | 0.00   | 6.25 | 0.00 | 0.00 | 0.00 | 0.00 | 0.00 | 0.00 |
| -----+-----+-----+-----+-----+-----+-----+-----+-----+----- |      |        |      |      |      |      |      |      |      |
| Total                                                       | 24   | 16     | 30   | 79   | 47   | 21   |      |      |      |
| 49                                                          | 266  |        |      |      |      |      |      |      |      |

Frequency Missing = 257

Table of education by RminusL

|                                                             |       |         |       |       |        |      |  |  |  |
|-------------------------------------------------------------|-------|---------|-------|-------|--------|------|--|--|--|
| education(Education)                                        |       | RminusL |       |       |        |      |  |  |  |
| Frequency                                                   |       |         |       |       |        |      |  |  |  |
| Row Pct                                                     |       |         |       |       |        |      |  |  |  |
| Col Pct                                                     |       | -3      | -2    | -1    | 0      | 1    |  |  |  |
| 2                                                           | 3     | Total   |       |       |        |      |  |  |  |
| -----+-----+-----+-----+-----+-----+-----+-----+-----+----- |       |         |       |       |        |      |  |  |  |
| Some high school                                            | 0     | 0       | 0     | 0     | 3      | 0    |  |  |  |
| 0                                                           | 0     | 3       |       |       |        |      |  |  |  |
| or less                                                     | 0.00  | 0.00    | 0.00  | 0.00  | 100.00 | 0.00 |  |  |  |
| 0.00                                                        | 0.00  | 0.00    | 0.00  | 0.00  | 4.48   | 0.00 |  |  |  |
| 0.00                                                        | 0.00  |         |       |       |        |      |  |  |  |
| -----+-----+-----+-----+-----+-----+-----+-----+-----+----- |       |         |       |       |        |      |  |  |  |
| High school grad                                            | 4     | 5       | 8     | 5     | 7      |      |  |  |  |
| 2                                                           | 7     | 38      |       |       |        |      |  |  |  |
| uate or GED                                                 | 10.53 | 13.16   | 21.05 | 13.16 | 18.42  |      |  |  |  |
| 5.26                                                        | 18.42 |         |       |       |        |      |  |  |  |
|                                                             | 22.22 | 41.67   | 28.57 | 7.46  | 16.28  |      |  |  |  |
| 11.11                                                       | 14.58 |         |       |       |        |      |  |  |  |



|                                           |       |       |       |       |       |       |    |
|-------------------------------------------|-------|-------|-------|-------|-------|-------|----|
|                                           |       | 0.00  | 5.56  | 22.22 | 33.33 | 16.67 |    |
| 5.56                                      | 16.67 |       |       |       |       |       |    |
|                                           |       | 0.00  | 9.09  | 14.81 | 8.82  | 7.14  |    |
| 6.25                                      | 6.67  |       |       |       |       |       |    |
| -----+-----+-----+-----+-----+-----+----- |       |       |       |       |       |       |    |
| ----+-----+-----                          |       |       |       |       |       |       |    |
| Disabled                                  |       | 1     | 1     | 4     | 3     | 2     | 1  |
|                                           | 2     | 14    |       |       |       |       |    |
|                                           |       | 7.14  | 7.14  | 28.57 | 21.43 | 14.29 |    |
| 7.14                                      | 14.29 |       |       |       |       |       |    |
|                                           |       | 5.00  | 9.09  | 14.81 | 4.41  | 4.76  |    |
| 6.25                                      | 4.44  |       |       |       |       |       |    |
| -----+-----+-----+-----+-----+-----+----- |       |       |       |       |       |       |    |
| ----+-----+-----                          |       |       |       |       |       |       |    |
| Student                                   |       | 0     | 1     | 1     | 5     | 3     | 1  |
|                                           | 4     | 15    |       |       |       |       |    |
|                                           |       | 0.00  | 6.67  | 6.67  | 33.33 | 20.00 |    |
| 6.67                                      | 26.67 |       |       |       |       |       |    |
|                                           |       | 0.00  | 9.09  | 3.70  | 7.35  | 7.14  |    |
| 6.25                                      | 8.89  |       |       |       |       |       |    |
| -----+-----+-----+-----+-----+-----+----- |       |       |       |       |       |       |    |
| ----+-----+-----                          |       |       |       |       |       |       |    |
| Homemaker                                 |       | 2     | 1     | 2     | 7     | 3     | 1  |
|                                           | 4     | 20    |       |       |       |       |    |
|                                           |       | 10.00 | 5.00  | 10.00 | 35.00 | 15.00 |    |
| 5.00                                      | 20.00 |       |       |       |       |       |    |
|                                           |       | 10.00 | 9.09  | 7.41  | 10.29 | 7.14  |    |
| 6.25                                      | 8.89  |       |       |       |       |       |    |
| -----+-----+-----+-----+-----+-----+----- |       |       |       |       |       |       |    |
| ----+-----+-----                          |       |       |       |       |       |       |    |
| Retired                                   |       | 0     | 2     | 2     | 3     | 3     | 0  |
|                                           | 2     | 12    |       |       |       |       |    |
|                                           |       | 0.00  | 16.67 | 16.67 | 25.00 | 25.00 |    |
| 0.00                                      | 16.67 |       |       |       |       |       |    |
|                                           |       | 0.00  | 18.18 | 7.41  | 4.41  | 7.14  |    |
| 0.00                                      | 4.44  |       |       |       |       |       |    |
| -----+-----+-----+-----+-----+-----+----- |       |       |       |       |       |       |    |
| ----+-----+-----                          |       |       |       |       |       |       |    |
| Total                                     |       | 20    | 11    | 27    | 68    | 42    | 16 |
| 45                                        | 229   |       |       |       |       |       |    |

Frequency Missing = 294

Table of headache\_dx by RminusL

headache\_dx(Principle Headache Diagnosis)

RminusL

| Frequency                           |        |        |        |        |        |        |
|-------------------------------------|--------|--------|--------|--------|--------|--------|
| Row Pct                             |        |        |        |        |        |        |
| Col Pct                             |        | -3     | -2     | -1     | 0      | 1      |
| 2                                   | 3      | Total  |        |        |        |        |
| -----+-----+-----+-----+-----+----- |        |        |        |        |        |        |
| +-----+-----+                       |        |        |        |        |        |        |
| Migraine                            |        | 24     | 17     | 33     | 80     | 47     |
| 22                                  | 50     | 273    |        |        |        |        |
|                                     |        | 8.79   | 6.23   | 12.09  | 29.30  | 17.22  |
| 8.06                                | 18.32  |        |        |        |        |        |
|                                     |        | 100.00 | 100.00 | 100.00 | 100.00 | 100.00 |
| 100.00                              | 100.00 |        |        |        |        |        |
| -----+-----+-----+-----+-----+----- |        |        |        |        |        |        |
| +-----+-----+                       |        |        |        |        |        |        |
| Total                               |        | 24     | 17     | 33     | 80     | 47     |
| 22                                  | 50     | 273    |        |        |        |        |

Frequency Missing = 250

Table of hand by RminusL

hand(Handedness)

RminusL

| Frequency                           |       |       |       |      |       |      |
|-------------------------------------|-------|-------|-------|------|-------|------|
| Row Pct                             |       |       |       |      |       |      |
| Col Pct                             |       | -3    | -2    | -1   | 0     | 1    |
| 2                                   | 3     | Total |       |      |       |      |
| -----+-----+-----+-----+-----+----- |       |       |       |      |       |      |
| +-----+-----+                       |       |       |       |      |       |      |
| Left                                |       | 7     | 2     | 0    | 9     | 2    |
| 0                                   | 5     | 25    |       |      |       |      |
|                                     |       | 28.00 | 8.00  | 0.00 | 36.00 | 8.00 |
| 0.00                                | 20.00 |       |       |      |       |      |
|                                     |       | 30.43 | 13.33 | 0.00 | 12.00 | 4.88 |
| 0.00                                | 10.87 |       |       |      |       |      |
| -----+-----+-----+-----+-----+----- |       |       |       |      |       |      |
| +-----+-----+                       |       |       |       |      |       |      |
| Right                               |       | 16    | 13    | 27   | 65    | 39   |
| 41                                  | 221   |       |       |      |       | 20   |

|                                     |       |     |       |       |        |        |       |  |
|-------------------------------------|-------|-----|-------|-------|--------|--------|-------|--|
|                                     |       |     | 7.24  | 5.88  | 12.22  | 29.41  | 17.65 |  |
| 9.05                                | 18.55 |     |       |       |        |        |       |  |
|                                     |       |     | 69.57 | 86.67 | 100.00 | 86.67  | 95.12 |  |
| 100.00                              | 89.13 |     |       |       |        |        |       |  |
| -----+-----+-----+-----+-----+----- |       |     |       |       |        |        |       |  |
| +-----+-----+                       |       |     |       |       |        |        |       |  |
| Right preference                    |       |     | 0     |       | 0      |        | 0     |  |
|                                     | 0     | 0   | 0     |       |        |        |       |  |
|                                     |       |     | .     |       | .      |        | .     |  |
|                                     | .     |     |       |       |        |        |       |  |
|                                     |       |     | 0.00  | 0.00  | 0.00   | 0.00   | 0.00  |  |
| 0.00                                | 0.00  |     |       |       |        |        |       |  |
| -----+-----+-----+-----+-----+----- |       |     |       |       |        |        |       |  |
| +-----+-----+                       |       |     |       |       |        |        |       |  |
| Ambidextrous                        |       |     | 0     |       | 0      |        | 1     |  |
| 0                                   | 0     |     | 1     |       |        |        |       |  |
|                                     |       |     | 0.00  | 0.00  | 0.00   | 100.00 | 0.00  |  |
| 0.00                                | 0.00  |     |       |       |        |        |       |  |
|                                     |       |     | 0.00  | 0.00  | 0.00   | 1.33   | 0.00  |  |
| 0.00                                | 0.00  |     |       |       |        |        |       |  |
| -----+-----+-----+-----+-----+----- |       |     |       |       |        |        |       |  |
| +-----+-----+                       |       |     |       |       |        |        |       |  |
| Total                               |       |     | 23    | 15    | 27     | 75     | 41    |  |
| 20                                  | 46    | 247 |       |       |        |        |       |  |

Frequency Missing = 276

~~~~~  
~~~~~

#### Jonckheere-Terpstra Test for trend p-values

|                             |        |
|-----------------------------|--------|
| Table sex * RminusL         | 0.3297 |
| Table White * RminusL       | 0.3275 |
| Table ethnicity * RminusL   | 0.5453 |
| Table Married * RminusL     | 0.7814 |
| Table CollegeGrad * RminusL | 0.1174 |
| Table Employed * RminusL    | 0.6424 |
| Table aura * RminusL        | 0.5733 |
| Table RightHanded * RminusL | 0.0736 |
| Table Substance * RminusL   | 0.6812 |
| Table Anxiety * RminusL     | 0.3265 |
| Table Depression * RminusL  | 0.5142 |
| Table Bipolar * RminusL     | 0.7507 |

```

Table Eating * RminusL          0.5579
Table Psychotic * RminusL       0.0863
Table PTSD * RminusL           0.0048
Table OpioidsPrior * RminusL    0.2507
Table BarbituratesPrior * RminusL 0.3609
Table TriptansPrior * RminusL   0.2693
Table OpioidsPost * RminusL     0.3893
Table BarbituratesPost * RminusL 0.1298
Table TriptansPost * RminusL    0.7369
Correlation of education level and RminusL is 0.11868, p=
0.0700, n=234

```

```

~~~~~
~~~~~

```

This helps to see the direction of the trend:

Analysis Variable :

RminusL

| PTSD       | Obs        | Mean      | Std Dev    | N         | Median |
|------------|------------|-----------|------------|-----------|--------|
| Minimum    |            | Maximum   |            |           |        |
| -----      |            |           |            |           |        |
|            | 0          | 494       | 0.4513619  | 1.7607283 | 257    |
| 0          | -3.0000000 | 3.0000000 |            |           |        |
|            | 1          | 29        | -0.8750000 | 1.7078251 | 16     |
| -0.5000000 | -3.0000000 | 3.0000000 |            |           |        |
| -----      |            |           |            |           |        |
| -----      |            |           |            |           |        |

PTSD sufferers differ from nonPTSD individuals whereby sufferers are on the left side on average, and non-sufferers are slightly on the right. Same can be seen in the crosstabulation above ( $p < 0.005$ ). Note that the N with PTSD is only 16.
